# Supplementary material for: Epidemiological analysis of respiratory and intestinal infectious diseases in three counties of Sichuan: the baseline survey of Disaster Mitigation Demonstration Area in western China
Source: PeerJ. 2019 Jul 23;7:e7341. doi: 10.7717/peerj.7341 (PMC6659668; doi:10.7717/peerj.7341)
Supplement: Data S1 — applied for data analyses and preparation for Fig. 1. [file peerj-07-7341-s009.xlsx]

## Sheet: figure 1 
ID	longitude	latitude	Altitude
L1	105.41	29.249	317
L2	105.454	29.2659	309
L3	105.339	29.261	296
L4	105.369	29.2082	291
L5	105.42	29.0959	330
L6	105.347	29.0857	263
L7	105.291	28.975	268
L8	105.239	29.0543	282
L9	105.298	29.1099	325
L10	105.653	29.0861	407
L11	105.694	29.1523	374
L12	105.723	29.0452	311
L13	105.584	28.9899	354
L14	105.648	28.9835	348
L15	105.578	29.2093	377
L16	105.568	29.2515	326
L17	105.654	29.2481	399
L18	105.53	29.1345	375
L19	105.494	29.064	319
S1	104.178	31.1331	520
S2	104.162	31.1375	530
S3	104.163	31.1282	524
S4	104.187	31.113	513
S5	104.217	31.1531	514
S6	104.173	31.1752	542
S7	104.131	31.1774	562
S8	104.065	31.2524	657
S9	104.021	31.3205	751
S10	104.032	31.3806	870
S11	103.983	31.2612	916
S12	104.07	31.1629	570
S13	104.055	31.219	609
S14	104.132	31.0621	519
S15	104.091	31.0929	542
S16	104.096	31.1421	552
Y1	102.517	28.6475	1672
Y2	102.656	28.5015	1894
Y3	102.506	28.5936	1711
Y4	102.544	28.7049	1642
Y5	102.61	28.7448	1495
Y6	102.539	28.6614	1728
Y7	102.506	28.6529	1720
Y8	102.519	28.5623	1715
Y9	102.509	28.6088	1702
Y10	102.491	28.6182	1990
Y11	102.476	28.5438	1679
Y12	102.513	28.5397	1741
Y13	102.494	28.4722	2026
Y14	102.541	28.6897	1679
Y15	102.545	28.7433	1687
Y16	102.517	28.7333	1740
Y17	102.601	28.8147	1495
Y18	102.603	28.8532	1392
Y19	102.564	28.7989	1984
Y20	102.633	28.616	1804
Y21	102.641	28.6131	1919
Y22	102.608	28.6818	1727
Y23	102.638	28.5021	1904
Y24	102.651	28.4794	1679
Y25	102.64	28.5521	1955
Y26	102.69	28.5573	2339
Y27	102.681	28.455	2100
Y28	102.707	28.4207	2242
Y29	102.683	28.3834	2144
Y30	102.778	28.3738	2475
Y31	102.579	28.4552	2246
Y32	102.545	28.5025	1942
Y33	102.629	28.4076	2143
Y34	102.829	28.4452	2704
Y35	102.854	28.431	2547
Y36	102.863	28.3455	2743
Y37	102.81	28.5478	2740
Y38	102.805	28.5986	2606
