# Supplementary material for: Epidemiological analysis of respiratory and intestinal infectious diseases in three counties of Sichuan: the baseline survey of Disaster Mitigation Demonstration Area in western China
Source: PeerJ. 2019 Jul 23;7:e7341. doi: 10.7717/peerj.7341 (PMC6659668; doi:10.7717/peerj.7341)
Supplement: Data S3 [file peerj-07-7341-s011.xls]

## Sheet: RIDs
ID	L1	L2	L3	L4	L5	L6	L7	L8	L9	L10	L11	L12	L13	L14	L15	L16	L17	L18	L19	S1	S2	S3	S4	S5	S6	S7	S8	S9	S10	S11	S12	S13	S14	S15	S16	Y1	Y2	Y3	Y4	Y5	Y6	Y7	Y8	Y9	Y10	Y11	Y12	Y13	Y14
measles11	0	0	0	0	0	0	0	1.28	0	0	0	0	0	0	0	0	0	0	0	0	0	0	0	0	0	0	1.72	0	0	0	0	1.79	0	0	0	2.22	5.13	3.98	2.93	0	0	5.37	2.5	3.59	0	2.91	10.64	0	0
TB11	9.88	10.26	9.93	16.04	9.87	9.77	8.89	7.6	8.99	8.89	7.97	7.49	9.88	8.04	8.46	9.52	8.56	8.34	8.84	7.79	8.01	9.7	7.55	8.25	7.33	10.08	8.07	8.79	8.79	9.36	9.18	8.01	7.03	6.59	8	10.32	13.09	7.45	9.25	13.37	12.82	13.69	9.34	7.18	6.87	14.52	28.81	10.75	10.49
mumps11	3.19	2.87	5.73	6.75	3.2	5.7	9.21	3.15	4.59	3.56	4.34	6.48	4.26	3.81	5.14	3.01	0	2.86	3.7	7.63	6.83	6.42	4.36	4	7.04	4.67	11.15	5.97	11.12	8.25	7.49	2.53	4.2	7.44	7.11	3.85	0	0	2.93	4.23	0	5.37	0	5.08	5.95	0	10.64	7.6	7.42
varicella11	3.19	4.54	4.05	13.3	10.62	3.9	5.13	5.6	5.62	4.6	7.67	3.74	7.23	5.39	4.69	7.68	4.54	6.24	5.23	5.7	5.4	4.85	4.36	4.47	2.03	3.81	2.98	3.45	0	4.41	2.65	2.53	5.94	5.62	3.67	3.15	2.1	2.82	2.93	0	4.4	0	0	8.03	8.42	4.11	6.14	0	0
measles12	0	0	0	1.35	0	0	0	0	0	0	0	0	0	0	0	0	0	0	0	0	0	0	0	0	0	0	0	0	0	0	0	0	0	0	0	0	0	0	0	0	0	0	0	0	0	0	0	0	0
TB12	9.46	8.38	8.39	13.97	7.73	10.1	6.63	8.23	7.95	7.6	7.97	7.35	8.52	9.19	8.4	7.68	7.86	6.86	7.52	7.68	8.37	9.07	6.16	10.2	8.86	8.94	8.6	7.71	8.79	7.64	8.09	8.41	8.19	6.89	7.11	9.31	13.26	7.45	8.27	7.91	11.64	14.21	11.97	8.79	9.09	8.71	31.92	9.31	10.05
mumps12	1.43	3.21	6.85	8.96	4.89	4.17	3.42	3.85	4.19	2.37	5.32	5.66	3.01	6.29	5.55	5.83	3.71	2.02	4.84	5.07	4.18	5.42	3.9	4.47	4.07	3.3	5.71	4.22	5.56	0	3.75	3.58	4.97	0	6.87	6.29	2.1	4.88	2.93	2.99	20.63	3.8	0	6.22	6.87	2.91	12.29	0	6.77
varicella12	4.28	3.21	3.75	11.7	3.7	3.9	4.53	5.89	7.26	5.04	2.66	6.64	6.57	3.04	3.93	4.26	6.24	4.29	4.63	6.61	9.04	6.42	7.29	6.64	9.09	5.04	4.87	4.88	11.8	5.4	2.16	4.01	8.19	5.62	6.62	5.45	0	2.82	0	0	5.39	3.8	2.5	6.22	0	2.91	10.64	5.37	3.03
measles13	0	0	0	0	1.31	0	0	0	0	0	0	0	0	0	0	0	0	0	0	0	0	0	0	0	0	0	0	0	0	0	0	0	0	0	0	0	0	0	0	0	0	0	0	0	0	0	0	0	0
TB13	8.32	8.62	8.94	13.3	7.95	7.36	8.72	7.81	9.92	7.88	6.51	7.62	8.11	8.82	8.66	9.99	8.69	7.01	8.38	7.85	8.37	10	7.8	6.93	9.09	7.38	7.3	9.75	6.81	12.48	7.95	8.59	5.94	7.7	9	9.44	10.69	6.9	9.7	8.97	8.8	9.3	9.34	8.79	6.87	10.47	29.46	10.75	10.05
mumps13	2.02	2.87	2.66	8.22	6.13	4.66	5.67	2.87	5.62	2.37	1.53	1.41	3.01	3.81	4.69	3.98	3.38	2.48	4.84	5.99	4.83	3.43	9.55	4.47	0	4.26	4.87	3.45	0	4.41	4.05	1.79	4.6	0	3.67	3.52	0	4.88	0	0	4.4	5.37	4.99	5.08	3.44	0	6.14	0	0
varicella13	3.49	4.31	7.19	11.93	4.53	7.22	3.83	4.98	4.96	2.37	4.34	3.47	4.76	4.14	3.48	4.76	5.24	3.2	6.7	8.53	8.37	7.67	6.75	4.47	6.43	8.09	4.21	4.22	6.81	4.41	4.05	2.53	12.46	8.67	4.86	6.49	2.96	2.82	4.14	5.18	0	0	3.53	6.22	0	0	13.74	0	6.77
measles14	0	0	1.53	0	0	0	0	0	0	0	0	0	0	0	0	0	0	0	0	0	0	0	0	0	0	0	0	0	0	0	1.53	0	0	0	0	1.57	0	0	0	0	0	0	0	0	0	0	0	0	0
TB14	7.81	7.87	7.02	12.81	7.16	5.1	7.46	5.14	7.5	7.51	7.2	6.17	5.43	7.35	7.2	7.38	7.1	6.71	6.55	8.43	9.96	6.86	6.46	8	7.87	10.44	5.44	9.75	7.87	9.36	7.95	7.6	5.64	7.44	6.36	7.55	10.69	0	7.74	6.69	8.8	8.49	9.34	5.08	9.72	8.22	27.47	12.02	5.25
mumps14	5.34	2.49	3.06	4.48	2.62	2.55	3.42	2.87	2.65	2.91	0	4.24	1.51	1.62	3.64	4.26	3.71	1.43	2.79	4.34	4.18	3.43	3.38	3.47	3.52	1.91	2.98	2.44	3.93	3.12	4.33	1.79	2.66	1.99	3.67	0	2.1	0	0	0	0	0	0	0	0	0	0	0	0
varicella14	4.73	3.21	3.06	10.02	6.4	4.17	2.96	4.26	4.59	2.91	2.17	2	4.76	3.04	4.81	4.99	7.41	5.54	4.63	6.27	5.92	6.86	3.9	6	7.04	6.32	3.85	8.45	5.56	3.12	1.53	5.38	4.2	4.87	3.18	3.85	0	0	2.93	2.99	3.11	0	3.53	3.59	0	2.91	0	0	0
measles15	0	0	0	0	0	0	0	0	0	0	0	0	0	0	0	0	0	0	0	1.31	0	0	1.95	0	2.03	1.91	0	0	0	0	0	0	0	0	0	3.15	5.93	2.82	4.14	5.18	5.39	0	0	0	0	2.91	13.74	0	0
TB15	7.13	7.04	7.19	12.6	6.4	6.25	6.4	5.75	6.49	6.72	7.67	7.22	7.23	7.08	7.64	7.53	6.24	6.24	7.26	7.79	8.71	10	8.5	6.64	5.75	6.6	7.7	10.34	8.79	9.36	7.95	7.17	6.51	9.11	7.79	11.56	14.67	6.3	12.06	11.58	13.19	12.01	11.97	6.22	10.87	11.62	32.51	9.31	12.12
mumps15	3.49	3.21	2.17	4.87	1.85	2.08	3.83	2.57	1.87	2.37	1.53	1.41	1.51	1.99	2.78	2.13	2.14	0	2.79	3.46	3.42	4.2	3.38	2.83	2.03	4.67	4.55	2.44	0	3.12	1.53	3.1	3.25	2.81	2.6	2.73	2.96	0	0	0	3.11	0	2.5	0	0	0	0	0	0
varicella15	4.03	4.06	4.85	10.11	6.13	6.25	3.42	5.14	3.24	3.14	2.66	5.48	1.51	4.3	5.75	4.99	5.66	3.51	2.79	8.06	4.18	4.85	6.46	3.47	9.09	6.87	3.85	5.97	0	5.4	3.75	2.53	6.51	2.81	4.11	2.73	3.63	2.82	2.93	0	3.11	0	0	0	0	2.91	0	0	7.42
[truncated: 24 more columns]

## Sheet: IIDs
ID	L1	L2	L3	L4	L5	L6	L7	L8	L9	L10	L11	L12	L13	L14	L15	L16	L17	L18	L19	S1	S2	S3	S4	S5	S6	S7	S8	S9	S10	S11	S12	S13	S14	S15	S16	Y1	Y2	Y3	Y4	Y5	Y6	Y7	Y8	Y9	Y10	Y11	Y12	Y13	Y14
HepA11	0	1.44	0	4.68	1.85	0	2.42	0	1.87	1.68	1.53	1.41	2.61	0	1.48	0	0	0	0	1.6	0	0	0	2.83	2.03	0	1.72	0	0	0	1.53	2.53	1.88	0	0	4.45	4.69	4.88	2.93	5.98	3.11	3.8	5.58	3.59	0	0	13.74	0	3.03
BD11	1.43	2.03	2.17	1.35	1.31	2.08	2.42	0	1.87	1.19	0	1.41	0	1.15	1.48	0	0	1.43	0	1.31	0	0	0	0	2.87	0	0	0	0	0	1.53	0	0	0	0	8.47	5.93	5.63	7.16	5.18	8.23	12.01	8.28	10.15	8.42	13.31	30.09	14.22	8.57
OID11	2.02	1.44	2.17	5.57	3.7	2.95	3.42	2.57	2.65	2.37	2.66	1.41	4.26	3.04	3.32	3.69	3.38	3.79	3.7	5.92	6.39	7.28	10.85	2.83	5.38	7.86	6.88	12.19	21.9	7.64	5.92	5.94	9.2	5.96	6.36	4.98	3.63	5.63	2.93	2.99	0	0	2.5	3.59	0	2.91	0	0	5.25
HFMD11	2.02	1.44	5.73	13.64	3.92	4.66	1.71	3.85	7.95	2.66	2.17	0	3.01	1.62	1.48	0	0	1.43	3.12	7.4	5.92	9.07	6.46	5.29	3.52	5.72	7.3	4.22	6.81	7.64	7.17	6.71	7.75	4.87	8	3.52	0	0	0	2.99	0	3.8	0	0	0	0	0	0	3.03
HepA12	2.02	2.49	0	3.31	1.85	2.08	0	0	3.24	1.68	0	1.41	1.51	1.15	0	0	0	1.43	1.97	1.6	0	2.42	0	2.83	0	0	1.72	3.45	0	3.12	0	0	0	0	0	5.45	3.63	6.3	2.93	2.99	5.39	6.58	4.99	0	3.44	5.81	0	0	3.03
BD12	2.02	0	0	1.35	0	0	2.96	0	1.87	1.19	0	1.41	1.51	0	0	0	0	0	0	1.6	0	0	1.95	0	2.03	2.69	3.85	2.44	6.81	4.41	1.53	1.79	1.88	1.99	3.18	9.04	4.69	7.96	7.74	5.18	10.77	12.01	9.67	9.5	8.42	11.98	22.15	10.75	12.12
OID12	2.85	0	2.17	5.73	2.62	3.9	3.83	2.22	3.24	3.14	2.66	1.41	3.37	3.98	3.15	2.13	2.14	3.2	5.23	6.27	7.25	8.4	9.55	5.66	4.55	7.86	5.96	6.45	12.44	5.4	5.51	6.21	7.28	4.45	4.11	2.22	2.96	2.82	4.14	2.99	3.11	3.8	4.99	3.59	0	2.91	0	0	5.25
HFMD12	3.49	1.44	4.33	13.37	5.55	4.66	0	3.4	2.65	2.06	3.07	2.83	3.37	3.25	2.97	4.52	0	5.54	4.84	8.97	9.66	6.86	9.55	6.93	7.33	11.44	12.88	8.79	6.81	14.96	8.24	9.48	5.64	9.11	6.87	3.85	0	2.82	0	2.99	0	0	0	3.59	0	0	0	0	0
HepA13	2.02	0	1.53	1.35	0	0	1.71	0	0	1.68	2.17	2.45	1.51	1.15	0	0	1.51	0	0	1.6	0	0	1.95	0	2.03	2.69	0	0	3.93	3.12	1.53	0	0	0	0	4.45	5.13	4.88	2.93	0	3.11	3.8	4.32	5.08	3.44	2.91	13.74	0	0
BD13	0	1.44	2.17	2.34	1.31	0	2.42	1.28	0	0	1.53	0	0	0	0	2.13	0	0	0	0	0	0	0	0	0	0	0	0	0	0	1.53	0	0	0	0	7.71	2.96	4.88	8.27	7.33	6.22	10.74	6.6	8.79	7.68	7.69	20.37	5.37	6.77
OID13	2.02	3.21	2.17	7.02	3.46	3.61	4.53	3.15	3.75	2.91	2.66	3.47	5.22	3.04	2.57	3.01	2.62	2.86	5.41	8.87	6.39	6.86	8.5	8	7.61	9.72	8.25	5.97	6.81	6.24	8.24	6.46	8.19	7.17	6.87	4.98	5.13	2.82	0	5.98	5.39	0	3.53	0	0	2.91	6.14	0	3.03
HFMD13	9.14	5.93	5.94	7.15	2.26	2.08	4.19	2.57	1.87	1.68	2.66	2.83	3.37	1.15	2.35	0	0	3.51	2.79	9.48	7.64	9.7	9.55	10.2	4.55	7.62	6.44	7.31	11.8	6.98	6.84	6.94	10.63	8.89	5.81	1.57	2.1	0	0	2.99	0	0	0	3.59	0	0	0	0	4.28
HepA14	2.47	0	0	2.7	1.31	0	0	0	0	0	0	2	1.51	0	0	0	0	0	0	1.85	0	0	0	0	3.52	0	2.43	0	0	0	0	0	2.66	0	1.84	3.52	3.63	5.63	4.14	0	3.11	0	4.32	5.08	0	0	6.14	0	3.03
BD14	0	0	1.53	2.7	1.31	2.55	0	1.82	0	1.19	0	0	0	0	1.05	1.51	0	0	1.4	1.6	0	0	0	0	0	0	0	0	0	0	0	0	0	0	0	6.09	5.13	6.9	6.54	5.18	5.39	3.8	4.99	3.59	8.42	8.71	15.05	9.31	6.77
OID14	0	0	1.53	2.7	1.31	2.55	0	1.82	0	1.19	0	0	0	0	1.05	1.51	0	0	1.4	4.53	4.18	4.2	5.51	5.66	4.98	6.32	4.21	5.45	5.56	3.12	5.72	4.39	4.6	4.87	4.86	3.52	4.69	3.98	2.93	2.99	0	3.8	4.99	0	3.44	4.11	10.64	0	0
HFMD14	6.38	2.87	4.6	15.1	6.13	6.07	0	2.87	5.62	4.9	5.09	5.83	7.68	2.81	9.03	7.38	6.24	6.71	5.23	17.82	16.73	17.15	18.07	14.43	17.01	17.15	12.99	20.83	13.62	14.63	15.29	15.73	17.22	16.87	12.72	9.83	4.19	7.96	5.85	2.99	5.39	0	2.5	10.15	5.95	4.11	0	5.37	3.03
HepA15	1.43	0	1.53	2.34	0	1.47	0	0	0	1.19	0	0	0	0	1.05	1.51	0	0	0	1.85	3.42	2.42	1.95	0	0	0	1.72	0	0	4.41	2.65	3.1	0	3.44	1.84	4.72	2.96	3.98	0	2.99	3.11	0	3.53	5.08	0	0	8.69	0	5.25
BD15	0	0	0	0	0	0	1.71	0	0	0	0	0	0	0	0	0	0	0	0	0	0	0	0	0	2.03	0	0	0	0	0	0	0	0	0	0	5.89	5.55	7.96	4.14	5.18	7.62	7.59	4.32	3.59	10.31	11.25	19.43	7.6	7.42
OID15	2.85	2.03	4.6	10.55	4.34	3.61	5.41	3.15	4.19	5.57	3.76	5.83	6.39	4.73	6.03	3.98	4.28	3.51	7.39	4.44	5.4	4.2	3.38	0	3.52	4.67	4.87	5.45	0	6.98	5.51	4.39	3.25	4.45	4.11	3.52	2.96	3.98	4.14	2.99	0	0	0	0	3.44	0	12.29	0	4.28
HFMD15	3.49	2.87	4.6	9.83	3.92	4.42	1.71	4.06	0	4.28	4.6	1.41	3.01	4.3	7.12	4.26	4	6.24	3.7	13.78	10.53	14.95	11.53	8.72	13.93	9.53	15.2	11.69	8.79	14.96	12.52	12.67	9.76	10.89	11.61	5.89	2.1	6.3	2.93	0	4.4	0	2.5	5.08	3.44	4.11	0	0	4.28
[truncated: 24 more columns]
