# Supplementary material for: Epidemiological analysis of respiratory and intestinal infectious diseases in three counties of Sichuan: the baseline survey of Disaster Mitigation Demonstration Area in western China
Source: PeerJ. 2019 Jul 23;7:e7341. doi: 10.7717/peerj.7341 (PMC6659668; doi:10.7717/peerj.7341)
Supplement: Data S5 [file peerj-07-7341-s013.xlsx]

## Sheet: 2011 RIDs
DQ	age	gender	disease	number
Lu	1	male	pulmonary tuberculosis	0
Lu	2	male	pulmonary tuberculosis	0
Lu	3	male	pulmonary tuberculosis	1
Lu	4	male	pulmonary tuberculosis	0
Lu	5	male	pulmonary tuberculosis	0
Lu	6	male	pulmonary tuberculosis	0
Lu	7	male	pulmonary tuberculosis	0
Lu	8	male	pulmonary tuberculosis	1
Lu	9	male	pulmonary tuberculosis	0
Lu	10	male	pulmonary tuberculosis	0
Lu	11	male	pulmonary tuberculosis	0
Lu	12	male	pulmonary tuberculosis	19
Lu	13	male	pulmonary tuberculosis	24
Lu	14	male	pulmonary tuberculosis	45
Lu	15	male	pulmonary tuberculosis	121
Lu	16	male	pulmonary tuberculosis	98
Lu	17	male	pulmonary tuberculosis	210
Lu	18	male	pulmonary tuberculosis	106
Lu	19	male	pulmonary tuberculosis	50
Shifang	1	male	pulmonary tuberculosis	0
Shifang	2	male	pulmonary tuberculosis	0
Shifang	3	male	pulmonary tuberculosis	0
Shifang	4	male	pulmonary tuberculosis	0
Shifang	5	male	pulmonary tuberculosis	0
Shifang	6	male	pulmonary tuberculosis	0
Shifang	7	male	pulmonary tuberculosis	0
Shifang	8	male	pulmonary tuberculosis	0
Shifang	9	male	pulmonary tuberculosis	0
Shifang	10	male	pulmonary tuberculosis	0
Shifang	11	male	pulmonary tuberculosis	0
Shifang	12	male	pulmonary tuberculosis	7
Shifang	13	male	pulmonary tuberculosis	30
Shifang	14	male	pulmonary tuberculosis	26
Shifang	15	male	pulmonary tuberculosis	29
Shifang	16	male	pulmonary tuberculosis	44
Shifang	17	male	pulmonary tuberculosis	48
Shifang	18	male	pulmonary tuberculosis	38
Shifang	19	male	pulmonary tuberculosis	17
Yuexi	1	male	pulmonary tuberculosis	3
Yuexi	2	male	pulmonary tuberculosis	1
Yuexi	3	male	pulmonary tuberculosis	0
Yuexi	4	male	pulmonary tuberculosis	0
Yuexi	5	male	pulmonary tuberculosis	0
Yuexi	6	male	pulmonary tuberculosis	2
Yuexi	7	male	pulmonary tuberculosis	0
Yuexi	8	male	pulmonary tuberculosis	0
Yuexi	9	male	pulmonary tuberculosis	1
Yuexi	10	male	pulmonary tuberculosis	0
Yuexi	11	male	pulmonary tuberculosis	5
Yuexi	12	male	pulmonary tuberculosis	28
Yuexi	13	male	pulmonary tuberculosis	54
Yuexi	14	male	pulmonary tuberculosis	71
Yuexi	15	male	pulmonary tuberculosis	52
Yuexi	16	male	pulmonary tuberculosis	26
Yuexi	17	male	pulmonary tuberculosis	15
Yuexi	18	male	pulmonary tuberculosis	17
Yuexi	19	male	pulmonary tuberculosis	8
Lu	1	female	pulmonary tuberculosis	0
Lu	2	female	pulmonary tuberculosis	0
Lu	3	female	pulmonary tuberculosis	0
Lu	4	female	pulmonary tuberculosis	0
Lu	5	female	pulmonary tuberculosis	0
Lu	6	female	pulmonary tuberculosis	0
Lu	7	female	pulmonary tuberculosis	0
Lu	8	female	pulmonary tuberculosis	0
Lu	9	female	pulmonary tuberculosis	0
Lu	10	female	pulmonary tuberculosis	0
Lu	11	female	pulmonary tuberculosis	2
Lu	12	female	pulmonary tuberculosis	12
Lu	13	female	pulmonary tuberculosis	30
Lu	14	female	pulmonary tuberculosis	23
Lu	15	female	pulmonary tuberculosis	47
Lu	16	female	pulmonary tuberculosis	28
Lu	17	female	pulmonary tuberculosis	39
Lu	18	female	pulmonary tuberculosis	20
Lu	19	female	pulmonary tuberculosis	7
Shifang	1	female	pulmonary tuberculosis	0
Shifang	2	female	pulmonary tuberculosis	0
Shifang	3	female	pulmonary tuberculosis	0
Shifang	4	female	pulmonary tuberculosis	0
Shifang	5	female	pulmonary tuberculosis	0
Shifang	6	female	pulmonary tuberculosis	0
Shifang	7	female	pulmonary tuberculosis	0
Shifang	8	female	pulmonary tuberculosis	0
Shifang	9	female	pulmonary tuberculosis	0
Shifang	10	female	pulmonary tuberculosis	0
Shifang	11	female	pulmonary tuberculosis	0
Shifang	12	female	pulmonary tuberculosis	5
Shifang	13	female	pulmonary tuberculosis	15
Shifang	14	female	pulmonary tuberculosis	5
Shifang	15	female	pulmonary tuberculosis	24
Shifang	16	female	pulmonary tuberculosis	15
Shifang	17	female	pulmonary tuberculosis	19
Shifang	18	female	pulmonary tuberculosis	9
Shifang	19	female	pulmonary tuberculosis	3
Yuexi	1	female	pulmonary tuberculosis	0
Yuexi	2	female	pulmonary tuberculosis	0
Yuexi	3	female	pulmonary tuberculosis	0
Yuexi	4	female	pulmonary tuberculosis	0
Yuexi	5	female	pulmonary tuberculosis	0
Yuexi	6	female	pulmonary tuberculosis	0
Yuexi	7	female	pulmonary tuberculosis	0
Yuexi	8	female	pulmonary tuberculosis	0
Yuexi	9	female	pulmonary tuberculosis	0
Yuexi	10	female	pulmonary tuberculosis	0
Yuexi	11	female	pulmonary tuberculosis	8
Yuexi	12	female	pulmonary tuberculosis	30
Yuexi	13	female	pulmonary tuberculosis	23
Yuexi	14	female	pulmonary tuberculosis	31
Yuexi	15	female	pulmonary tuberculosis	16
Yuexi	16	female	pulmonary tuberculosis	6
Yuexi	17	female	pulmonary tuberculosis	11
Yuexi	18	female	pulmonary tuberculosis	13
Yuexi	19	female	pulmonary tuberculosis	1
Lu	1	male	mumps	0
Lu	2	male	mumps	1
Lu	3	male	mumps	2
Lu	4	male	mumps	13
Lu	5	male	mumps	18
Lu	6	male	mumps	22
Lu	7	male	mumps	14
Lu	8	male	mumps	8
Lu	9	male	mumps	15
Lu	10	male	mumps	11
Lu	11	male	mumps	19
Lu	12	male	mumps	2
Lu	13	male	mumps	2
Lu	14	male	mumps	2
Lu	15	male	mumps	1
Lu	16	male	mumps	0
Lu	17	male	mumps	0
Lu	18	male	mumps	0
Lu	19	male	mumps	0
Shifang	1	male	mumps	1
Shifang	2	male	mumps	2
Shifang	3	male	mumps	7
Shifang	4	male	mumps	13
Shifang	5	male	mumps	13
Shifang	6	male	mumps	33
Shifang	7	male	mumps	23
Shifang	8	male	mumps	16
Shifang	9	male	mumps	6
Shifang	10	male	mumps	5
Shifang	11	male	mumps	13
Shifang	12	male	mumps	1
Shifang	13	male	mumps	1
Shifang	14	male	mumps	4
Shifang	15	male	mumps	2
Shifang	16	male	mumps	1
Shifang	17	male	mumps	1
Shifang	18	male	mumps	1
Shifang	19	male	mumps	0
Yuexi	1	male	mumps	0
Yuexi	2	male	mumps	0
Yuexi	3	male	mumps	3
Yuexi	4	male	mumps	2
Yuexi	5	male	mumps	4
Yuexi	6	male	mumps	1
Yuexi	7	male	mumps	5
Yuexi	8	male	mumps	1
Yuexi	9	male	mumps	3
Yuexi	10	male	mumps	1
Yuexi	11	male	mumps	7
Yuexi	12	male	mumps	1
Yuexi	13	male	mumps	0
Yuexi	14	male	mumps	1
Yuexi	15	male	mumps	0
Yuexi	16	male	mumps	0
Yuexi	17	male	mumps	0
Yuexi	18	male	mumps	0
Yuexi	19	male	mumps	0
Lu	1	female	mumps	0
Lu	2	female	mumps	1
Lu	3	female	mumps	4
Lu	4	female	mumps	3
Lu	5	female	mumps	5
Lu	6	female	mumps	9
Lu	7	female	mumps	6
Lu	8	female	mumps	4
Lu	9	female	mumps	8
Lu	10	female	mumps	11
Lu	11	female	mumps	19
Lu	12	female	mumps	1
Lu	13	female	mumps	0
Lu	14	female	mumps	1
Lu	15	female	mumps	2
Lu	16	female	mumps	1
Lu	17	female	mumps	1
Lu	18	female	mumps	0
Lu	19	female	mumps	0
Shifang	1	female	mumps	0
Shifang	2	female	mumps	1
Shifang	3	female	mumps	4
Shifang	4	female	mumps	8
Shifang	5	female	mumps	19
Shifang	6	female	mumps	12
Shifang	7	female	mumps	19
Shifang	8	female	mumps	9
Shifang	9	female	mumps	8
Shifang	10	female	mumps	0
Shifang	11	female	mumps	5
Shifang	12	female	mumps	1
Shifang	13	female	mumps	2
Shifang	14	female	mumps	4
Shifang	15	female	mumps	2
Shifang	16	female	mumps	3
Shifang	17	female	mumps	0
Shifang	18	female	mumps	0
Shifang	19	female	mumps	0
Yuexi	1	female	mumps	0
Yuexi	2	female	mumps	0
Yuexi	3	female	mumps	1
Yuexi	4	female	mumps	2
Yuexi	5	female	mumps	1
Yuexi	6	female	mumps	1
Yuexi	7	female	mumps	3
Yuexi	8	female	mumps	1
Yuexi	9	female	mumps	0
Yuexi	10	female	mumps	0
Yuexi	11	female	mumps	0
Yuexi	12	female	mumps	1
Yuexi	13	female	mumps	1
Yuexi	14	female	mumps	0
Yuexi	15	female	mumps	1
Yuexi	16	female	mumps	0
Yuexi	17	female	mumps	0
Yuexi	18	female	mumps	0
Yuexi	19	female	mumps	0
Lu	1	male	varicella	6
Lu	2	male	varicella	12
Lu	3	male	varicella	12
Lu	4	male	varicella	19
Lu	5	male	varicella	32
Lu	6	male	varicella	35
Lu	7	male	varicella	31
Lu	8	male	varicella	21
Lu	9	male	varicella	14
Lu	10	male	varicella	10
Lu	11	male	varicella	20
Lu	12	male	varicella	15
Lu	13	male	varicella	0
Lu	14	male	varicella	3
Lu	15	male	varicella	0
Lu	16	male	varicella	0
Lu	17	male	varicella	0
Lu	18	male	varicella	0
Lu	19	male	varicella	0
Shifang	1	male	varicella	3
Shifang	2	male	varicella	4
Shifang	3	male	varicella	4
Shifang	4	male	varicella	6
Shifang	5	male	varicella	7
Shifang	6	male	varicella	1
Shifang	7	male	varicella	1
Shifang	8	male	varicella	2
Shifang	9	male	varicella	3
Shifang	10	male	varicella	0
Shifang	11	male	varicella	3
Shifang	12	male	varicella	6
Shifang	13	male	varicella	0
Shifang	14	male	varicella	5
Shifang	15	male	varicella	0
Shifang	16	male	varicella	0
Shifang	17	male	varicella	0
Shifang	18	male	varicella	0
Shifang	19	male	varicella	0
Yuexi	1	male	varicella	2
Yuexi	2	male	varicella	2
Yuexi	3	male	varicella	0
Yuexi	4	male	varicella	1
Yuexi	5	male	varicella	2
Yuexi	6	male	varicella	0
Yuexi	7	male	varicella	1
Yuexi	8	male	varicella	1
Yuexi	9	male	varicella	3
Yuexi	10	male	varicella	1
Yuexi	11	male	varicella	3
Yuexi	12	male	varicella	1
Yuexi	13	male	varicella	0
Yuexi	14	male	varicella	0
Yuexi	15	male	varicella	0
Yuexi	16	male	varicella	0
Yuexi	17	male	varicella	0
Yuexi	18	male	varicella	0
Yuexi	19	male	varicella	0
Lu	1	female	varicella	2
Lu	2	female	varicella	8
Lu	3	female	varicella	11
Lu	4	female	varicella	17
Lu	5	female	varicella	24
Lu	6	female	varicella	31
Lu	7	female	varicella	24
Lu	8	female	varicella	16
Lu	9	female	varicella	10
Lu	10	female	varicella	5
Lu	11	female	varicella	17
Lu	12	female	varicella	12
Lu	13	female	varicella	1
Lu	14	female	varicella	1
Lu	15	female	varicella	0
Lu	16	female	varicella	0
Lu	17	female	varicella	0
Lu	18	female	varicella	0
Lu	19	female	varicella	0
Shifang	1	female	varicella	3
Shifang	2	female	varicella	3
Shifang	3	female	varicella	1
Shifang	4	female	varicella	6
Shifang	5	female	varicella	4
Shifang	6	female	varicella	3
Shifang	7	female	varicella	1
Shifang	8	female	varicella	1
Shifang	9	female	varicella	3
Shifang	10	female	varicella	1
Shifang	11	female	varicella	11
Shifang	12	female	varicella	2
Shifang	13	female	varicella	7
Shifang	14	female	varicella	7
Shifang	15	female	varicella	0
Shifang	16	female	varicella	0
Shifang	17	female	varicella	0
Shifang	18	female	varicella	0
Shifang	19	female	varicella	0
Yuexi	1	female	varicella	0
Yuexi	2	female	varicella	2
Yuexi	3	female	varicella	2
Yuexi	4	female	varicella	0
Yuexi	5	female	varicella	1
Yuexi	6	female	varicella	0
Yuexi	7	female	varicella	0
Yuexi	8	female	varicella	0
Yuexi	9	female	varicella	0
Yuexi	10	female	varicella	2
Yuexi	11	female	varicella	0
Yuexi	12	female	varicella	0
Yuexi	13	female	varicella	0
Yuexi	14	female	varicella	3
Yuexi	15	female	varicella	0
Yuexi	16	female	varicella	0
Yuexi	17	female	varicella	0
Yuexi	18	female	varicella	0
Yuexi	19	female	varicella	0

## Sheet: 2011 IIDs
DQ	age	gender	disease	number
Lu	1	male	bacillary dysentery	1
Lu	2	male	bacillary dysentery	2
Lu	3	male	bacillary dysentery	0
Lu	4	male	bacillary dysentery	0
Lu	5	male	bacillary dysentery	0
Lu	6	male	bacillary dysentery	0
Lu	7	male	bacillary dysentery	1
Lu	8	male	bacillary dysentery	0
Lu	9	male	bacillary dysentery	0
Lu	10	male	bacillary dysentery	0
Lu	11	male	bacillary dysentery	1
Lu	12	male	bacillary dysentery	0
Lu	13	male	bacillary dysentery	0
Lu	14	male	bacillary dysentery	2
Lu	15	male	bacillary dysentery	0
Lu	16	male	bacillary dysentery	1
Lu	17	male	bacillary dysentery	0
Lu	18	male	bacillary dysentery	4
Lu	19	male	bacillary dysentery	0
Shifang	1	male	bacillary dysentery	0
Shifang	2	male	bacillary dysentery	0
Shifang	3	male	bacillary dysentery	0
Shifang	4	male	bacillary dysentery	0
Shifang	5	male	bacillary dysentery	0
Shifang	6	male	bacillary dysentery	0
Shifang	7	male	bacillary dysentery	0
Shifang	8	male	bacillary dysentery	0
Shifang	9	male	bacillary dysentery	0
Shifang	10	male	bacillary dysentery	0
Shifang	11	male	bacillary dysentery	1
Shifang	12	male	bacillary dysentery	0
Shifang	13	male	bacillary dysentery	0
Shifang	14	male	bacillary dysentery	0
Shifang	15	male	bacillary dysentery	0
Shifang	16	male	bacillary dysentery	1
Shifang	17	male	bacillary dysentery	0
Shifang	18	male	bacillary dysentery	0
Shifang	19	male	bacillary dysentery	0
Yuexi	1	male	bacillary dysentery	9
Yuexi	2	male	bacillary dysentery	27
Yuexi	3	male	bacillary dysentery	11
Yuexi	4	male	bacillary dysentery	5
Yuexi	5	male	bacillary dysentery	4
Yuexi	6	male	bacillary dysentery	2
Yuexi	7	male	bacillary dysentery	0
Yuexi	8	male	bacillary dysentery	0
Yuexi	9	male	bacillary dysentery	0
Yuexi	10	male	bacillary dysentery	4
Yuexi	11	male	bacillary dysentery	4
Yuexi	12	male	bacillary dysentery	1
Yuexi	13	male	bacillary dysentery	1
Yuexi	14	male	bacillary dysentery	14
Yuexi	15	male	bacillary dysentery	19
Yuexi	16	male	bacillary dysentery	6
Yuexi	17	male	bacillary dysentery	13
Yuexi	18	male	bacillary dysentery	17
Yuexi	19	male	bacillary dysentery	3
Lu	1	female	bacillary dysentery	3
Lu	2	female	bacillary dysentery	0
Lu	3	female	bacillary dysentery	0
Lu	4	female	bacillary dysentery	0
Lu	5	female	bacillary dysentery	1
Lu	6	female	bacillary dysentery	0
Lu	7	female	bacillary dysentery	0
Lu	8	female	bacillary dysentery	0
Lu	9	female	bacillary dysentery	0
Lu	10	female	bacillary dysentery	0
Lu	11	female	bacillary dysentery	0
Lu	12	female	bacillary dysentery	0
Lu	13	female	bacillary dysentery	0
Lu	14	female	bacillary dysentery	1
Lu	15	female	bacillary dysentery	2
Lu	16	female	bacillary dysentery	0
Lu	17	female	bacillary dysentery	1
Lu	18	female	bacillary dysentery	0
Lu	19	female	bacillary dysentery	0
Shifang	1	female	bacillary dysentery	0
Shifang	2	female	bacillary dysentery	0
Shifang	3	female	bacillary dysentery	0
Shifang	4	female	bacillary dysentery	0
Shifang	5	female	bacillary dysentery	0
Shifang	6	female	bacillary dysentery	0
Shifang	7	female	bacillary dysentery	0
Shifang	8	female	bacillary dysentery	0
Shifang	9	female	bacillary dysentery	0
Shifang	10	female	bacillary dysentery	0
Shifang	11	female	bacillary dysentery	0
Shifang	12	female	bacillary dysentery	0
Shifang	13	female	bacillary dysentery	0
Shifang	14	female	bacillary dysentery	2
Shifang	15	female	bacillary dysentery	1
Shifang	16	female	bacillary dysentery	0
Shifang	17	female	bacillary dysentery	0
Shifang	18	female	bacillary dysentery	0
Shifang	19	female	bacillary dysentery	0
Yuexi	1	female	bacillary dysentery	5
Yuexi	2	female	bacillary dysentery	7
Yuexi	3	female	bacillary dysentery	1
Yuexi	4	female	bacillary dysentery	5
Yuexi	5	female	bacillary dysentery	3
Yuexi	6	female	bacillary dysentery	0
Yuexi	7	female	bacillary dysentery	0
Yuexi	8	female	bacillary dysentery	0
Yuexi	9	female	bacillary dysentery	0
Yuexi	10	female	bacillary dysentery	1
Yuexi	11	female	bacillary dysentery	2
Yuexi	12	female	bacillary dysentery	4
Yuexi	13	female	bacillary dysentery	9
Yuexi	14	female	bacillary dysentery	10
Yuexi	15	female	bacillary dysentery	15
Yuexi	16	female	bacillary dysentery	7
Yuexi	17	female	bacillary dysentery	11
Yuexi	18	female	bacillary dysentery	4
Yuexi	19	female	bacillary dysentery	4
Lu	1	male	other infectious diarrhea	18
Lu	2	male	other infectious diarrhea	11
Lu	3	male	other infectious diarrhea	2
Lu	4	male	other infectious diarrhea	1
Lu	5	male	other infectious diarrhea	2
Lu	6	male	other infectious diarrhea	0
Lu	7	male	other infectious diarrhea	0
Lu	8	male	other infectious diarrhea	0
Lu	9	male	other infectious diarrhea	1
Lu	10	male	other infectious diarrhea	0
Lu	11	male	other infectious diarrhea	0
Lu	12	male	other infectious diarrhea	0
Lu	13	male	other infectious diarrhea	0
Lu	14	male	other infectious diarrhea	2
Lu	15	male	other infectious diarrhea	1
Lu	16	male	other infectious diarrhea	2
Lu	17	male	other infectious diarrhea	8
Lu	18	male	other infectious diarrhea	4
Lu	19	male	other infectious diarrhea	8
Shifang	1	male	other infectious diarrhea	40
Shifang	2	male	other infectious diarrhea	55
Shifang	3	male	other infectious diarrhea	35
Shifang	4	male	other infectious diarrhea	8
Shifang	5	male	other infectious diarrhea	1
Shifang	6	male	other infectious diarrhea	4
Shifang	7	male	other infectious diarrhea	1
Shifang	8	male	other infectious diarrhea	0
Shifang	9	male	other infectious diarrhea	2
Shifang	10	male	other infectious diarrhea	0
Shifang	11	male	other infectious diarrhea	1
Shifang	12	male	other infectious diarrhea	0
Shifang	13	male	other infectious diarrhea	2
Shifang	14	male	other infectious diarrhea	0
Shifang	15	male	other infectious diarrhea	2
Shifang	16	male	other infectious diarrhea	1
Shifang	17	male	other infectious diarrhea	1
Shifang	18	male	other infectious diarrhea	0
Shifang	19	male	other infectious diarrhea	0
Yuexi	1	male	other infectious diarrhea	5
Yuexi	2	male	other infectious diarrhea	3
Yuexi	3	male	other infectious diarrhea	1
Yuexi	4	male	other infectious diarrhea	0
Yuexi	5	male	other infectious diarrhea	0
Yuexi	6	male	other infectious diarrhea	1
Yuexi	7	male	other infectious diarrhea	0
Yuexi	8	male	other infectious diarrhea	0
Yuexi	9	male	other infectious diarrhea	0
Yuexi	10	male	other infectious diarrhea	0
Yuexi	11	male	other infectious diarrhea	1
Yuexi	12	male	other infectious diarrhea	0
Yuexi	13	male	other infectious diarrhea	1
Yuexi	14	male	other infectious diarrhea	0
Yuexi	15	male	other infectious diarrhea	4
Yuexi	16	male	other infectious diarrhea	0
Yuexi	17	male	other infectious diarrhea	0
Yuexi	18	male	other infectious diarrhea	0
Yuexi	19	male	other infectious diarrhea	0
Lu	1	female	other infectious diarrhea	13
Lu	2	female	other infectious diarrhea	4
Lu	3	female	other infectious diarrhea	1
Lu	4	female	other infectious diarrhea	0
Lu	5	female	other infectious diarrhea	0
Lu	6	female	other infectious diarrhea	1
Lu	7	female	other infectious diarrhea	1
Lu	8	female	other infectious diarrhea	1
Lu	9	female	other infectious diarrhea	0
Lu	10	female	other infectious diarrhea	0
Lu	11	female	other infectious diarrhea	1
Lu	12	female	other infectious diarrhea	2
Lu	13	female	other infectious diarrhea	0
Lu	14	female	other infectious diarrhea	2
Lu	15	female	other infectious diarrhea	1
Lu	16	female	other infectious diarrhea	3
Lu	17	female	other infectious diarrhea	6
Lu	18	female	other infectious diarrhea	4
Lu	19	female	other infectious diarrhea	2
Shifang	1	female	other infectious diarrhea	31
Shifang	2	female	other infectious diarrhea	47
Shifang	3	female	other infectious diarrhea	24
Shifang	4	female	other infectious diarrhea	6
Shifang	5	female	other infectious diarrhea	3
Shifang	6	female	other infectious diarrhea	0
Shifang	7	female	other infectious diarrhea	4
Shifang	8	female	other infectious diarrhea	2
Shifang	9	female	other infectious diarrhea	1
Shifang	10	female	other infectious diarrhea	1
Shifang	11	female	other infectious diarrhea	0
Shifang	12	female	other infectious diarrhea	0
Shifang	13	female	other infectious diarrhea	1
Shifang	14	female	other infectious diarrhea	1
Shifang	15	female	other infectious diarrhea	0
Shifang	16	female	other infectious diarrhea	0
Shifang	17	female	other infectious diarrhea	1
Shifang	18	female	other infectious diarrhea	1
Shifang	19	female	other infectious diarrhea	1
Yuexi	1	female	other infectious diarrhea	2
Yuexi	2	female	other infectious diarrhea	2
Yuexi	3	female	other infectious diarrhea	1
Yuexi	4	female	other infectious diarrhea	0
Yuexi	5	female	other infectious diarrhea	0
Yuexi	6	female	other infectious diarrhea	0
Yuexi	7	female	other infectious diarrhea	0
Yuexi	8	female	other infectious diarrhea	0
Yuexi	9	female	other infectious diarrhea	0
Yuexi	10	female	other infectious diarrhea	0
Yuexi	11	female	other infectious diarrhea	0
Yuexi	12	female	other infectious diarrhea	0
Yuexi	13	female	other infectious diarrhea	3
Yuexi	14	female	other infectious diarrhea	0
Yuexi	15	female	other infectious diarrhea	2
Yuexi	16	female	other infectious diarrhea	0
Yuexi	17	female	other infectious diarrhea	4
Yuexi	18	female	other infectious diarrhea	1
Yuexi	19	female	other infectious diarrhea	1
Lu	1	male	HFMD	3
Lu	2	male	HFMD	40
Lu	3	male	HFMD	35
Lu	4	male	HFMD	27
Lu	5	male	HFMD	14
Lu	6	male	HFMD	3
Lu	7	male	HFMD	0
Lu	8	male	HFMD	1
Lu	9	male	HFMD	0
Lu	10	male	HFMD	0
Lu	11	male	HFMD	0
Lu	12	male	HFMD	0
Lu	13	male	HFMD	0
Lu	14	male	HFMD	0
Lu	15	male	HFMD	0
Lu	16	male	HFMD	0
Lu	17	male	HFMD	0
Lu	18	male	HFMD	0
Lu	19	male	HFMD	0
Shifang	1	male	HFMD	5
Shifang	2	male	HFMD	43
Shifang	3	male	HFMD	53
Shifang	4	male	HFMD	33
Shifang	5	male	HFMD	12
Shifang	6	male	HFMD	2
Shifang	7	male	HFMD	0
Shifang	8	male	HFMD	0
Shifang	9	male	HFMD	0
Shifang	10	male	HFMD	0
Shifang	11	male	HFMD	2
Shifang	12	male	HFMD	0
Shifang	13	male	HFMD	0
Shifang	14	male	HFMD	0
Shifang	15	male	HFMD	0
Shifang	16	male	HFMD	0
Shifang	17	male	HFMD	0
Shifang	18	male	HFMD	0
Shifang	19	male	HFMD	0
Yuexi	1	male	HFMD	0
Yuexi	2	male	HFMD	3
Yuexi	3	male	HFMD	2
Yuexi	4	male	HFMD	1
Yuexi	5	male	HFMD	3
Yuexi	6	male	HFMD	0
Yuexi	7	male	HFMD	0
Yuexi	8	male	HFMD	0
Yuexi	9	male	HFMD	0
Yuexi	10	male	HFMD	0
Yuexi	11	male	HFMD	1
Yuexi	12	male	HFMD	0
Yuexi	13	male	HFMD	0
Yuexi	14	male	HFMD	0
Yuexi	15	male	HFMD	0
Yuexi	16	male	HFMD	0
Yuexi	17	male	HFMD	0
Yuexi	18	male	HFMD	0
Yuexi	19	male	HFMD	0
Lu	1	female	HFMD	3
Lu	2	female	HFMD	21
Lu	3	female	HFMD	13
Lu	4	female	HFMD	15
Lu	5	female	HFMD	5
Lu	6	female	HFMD	6
Lu	7	female	HFMD	1
Lu	8	female	HFMD	1
Lu	9	female	HFMD	1
Lu	10	female	HFMD	0
Lu	11	female	HFMD	0
Lu	12	female	HFMD	0
Lu	13	female	HFMD	0
Lu	14	female	HFMD	0
Lu	15	female	HFMD	0
Lu	16	female	HFMD	0
Lu	17	female	HFMD	0
Lu	18	female	HFMD	0
Lu	19	female	HFMD	0
Shifang	1	female	HFMD	0
Shifang	2	female	HFMD	35
Shifang	3	female	HFMD	27
Shifang	4	female	HFMD	16
Shifang	5	female	HFMD	4
Shifang	6	female	HFMD	4
Shifang	7	female	HFMD	0
Shifang	8	female	HFMD	0
Shifang	9	female	HFMD	0
Shifang	10	female	HFMD	0
Shifang	11	female	HFMD	1
Shifang	12	female	HFMD	0
Shifang	13	female	HFMD	0
Shifang	14	female	HFMD	0
Shifang	15	female	HFMD	0
Shifang	16	female	HFMD	0
Shifang	17	female	HFMD	0
Shifang	18	female	HFMD	0
Shifang	19	female	HFMD	0
Yuexi	1	female	HFMD	0
Yuexi	2	female	HFMD	0
Yuexi	3	female	HFMD	0
Yuexi	4	female	HFMD	0
Yuexi	5	female	HFMD	0
Yuexi	6	female	HFMD	0
Yuexi	7	female	HFMD	0
Yuexi	8	female	HFMD	0
Yuexi	9	female	HFMD	0
Yuexi	10	female	HFMD	0
Yuexi	11	female	HFMD	0
Yuexi	12	female	HFMD	0
Yuexi	13	female	HFMD	0
Yuexi	14	female	HFMD	0
Yuexi	15	female	HFMD	0
Yuexi	16	female	HFMD	0
Yuexi	17	female	HFMD	0
Yuexi	18	female	HFMD	0
Yuexi	19	female	HFMD	0

## Sheet: 2012 RIDs
DQ	age	gender	disease	number
Lu	1	male	pulmonary tuberculosis	0
Lu	2	male	pulmonary tuberculosis	0
Lu	3	male	pulmonary tuberculosis	0
Lu	4	male	pulmonary tuberculosis	0
Lu	5	male	pulmonary tuberculosis	0
Lu	6	male	pulmonary tuberculosis	0
Lu	7	male	pulmonary tuberculosis	0
Lu	8	male	pulmonary tuberculosis	0
Lu	9	male	pulmonary tuberculosis	0
Lu	10	male	pulmonary tuberculosis	0
Lu	11	male	pulmonary tuberculosis	1
Lu	12	male	pulmonary tuberculosis	17
Lu	13	male	pulmonary tuberculosis	24
Lu	14	male	pulmonary tuberculosis	36
Lu	15	male	pulmonary tuberculosis	85
Lu	16	male	pulmonary tuberculosis	106
Lu	17	male	pulmonary tuberculosis	154
Lu	18	male	pulmonary tuberculosis	98
Lu	19	male	pulmonary tuberculosis	40
Shifang	1	male	pulmonary tuberculosis	0
Shifang	2	male	pulmonary tuberculosis	0
Shifang	3	male	pulmonary tuberculosis	0
Shifang	4	male	pulmonary tuberculosis	0
Shifang	5	male	pulmonary tuberculosis	0
Shifang	6	male	pulmonary tuberculosis	0
Shifang	7	male	pulmonary tuberculosis	0
Shifang	8	male	pulmonary tuberculosis	0
Shifang	9	male	pulmonary tuberculosis	0
Shifang	10	male	pulmonary tuberculosis	0
Shifang	11	male	pulmonary tuberculosis	0
Shifang	12	male	pulmonary tuberculosis	6
Shifang	13	male	pulmonary tuberculosis	26
Shifang	14	male	pulmonary tuberculosis	25
Shifang	15	male	pulmonary tuberculosis	40
Shifang	16	male	pulmonary tuberculosis	44
Shifang	17	male	pulmonary tuberculosis	40
Shifang	18	male	pulmonary tuberculosis	23
Shifang	19	male	pulmonary tuberculosis	13
Yuexi	1	male	pulmonary tuberculosis	5
Yuexi	2	male	pulmonary tuberculosis	2
Yuexi	3	male	pulmonary tuberculosis	3
Yuexi	4	male	pulmonary tuberculosis	0
Yuexi	5	male	pulmonary tuberculosis	1
Yuexi	6	male	pulmonary tuberculosis	0
Yuexi	7	male	pulmonary tuberculosis	1
Yuexi	8	male	pulmonary tuberculosis	0
Yuexi	9	male	pulmonary tuberculosis	0
Yuexi	10	male	pulmonary tuberculosis	1
Yuexi	11	male	pulmonary tuberculosis	5
Yuexi	12	male	pulmonary tuberculosis	38
Yuexi	13	male	pulmonary tuberculosis	36
Yuexi	14	male	pulmonary tuberculosis	49
Yuexi	15	male	pulmonary tuberculosis	55
Yuexi	16	male	pulmonary tuberculosis	29
Yuexi	17	male	pulmonary tuberculosis	15
Yuexi	18	male	pulmonary tuberculosis	23
Yuexi	19	male	pulmonary tuberculosis	2
Lu	1	female	pulmonary tuberculosis	0
Lu	2	female	pulmonary tuberculosis	0
Lu	3	female	pulmonary tuberculosis	0
Lu	4	female	pulmonary tuberculosis	0
Lu	5	female	pulmonary tuberculosis	0
Lu	6	female	pulmonary tuberculosis	0
Lu	7	female	pulmonary tuberculosis	0
Lu	8	female	pulmonary tuberculosis	0
Lu	9	female	pulmonary tuberculosis	0
Lu	10	female	pulmonary tuberculosis	1
Lu	11	female	pulmonary tuberculosis	2
Lu	12	female	pulmonary tuberculosis	12
Lu	13	female	pulmonary tuberculosis	7
Lu	14	female	pulmonary tuberculosis	24
Lu	15	female	pulmonary tuberculosis	37
Lu	16	female	pulmonary tuberculosis	36
Lu	17	female	pulmonary tuberculosis	22
Lu	18	female	pulmonary tuberculosis	25
Lu	19	female	pulmonary tuberculosis	4
Shifang	1	female	pulmonary tuberculosis	0
Shifang	2	female	pulmonary tuberculosis	0
Shifang	3	female	pulmonary tuberculosis	0
Shifang	4	female	pulmonary tuberculosis	0
Shifang	5	female	pulmonary tuberculosis	0
Shifang	6	female	pulmonary tuberculosis	0
Shifang	7	female	pulmonary tuberculosis	0
Shifang	8	female	pulmonary tuberculosis	0
Shifang	9	female	pulmonary tuberculosis	0
Shifang	10	female	pulmonary tuberculosis	1
Shifang	11	female	pulmonary tuberculosis	0
Shifang	12	female	pulmonary tuberculosis	4
Shifang	13	female	pulmonary tuberculosis	10
Shifang	14	female	pulmonary tuberculosis	21
Shifang	15	female	pulmonary tuberculosis	23
Shifang	16	female	pulmonary tuberculosis	17
Shifang	17	female	pulmonary tuberculosis	17
Shifang	18	female	pulmonary tuberculosis	6
Shifang	19	female	pulmonary tuberculosis	7
Yuexi	1	female	pulmonary tuberculosis	1
Yuexi	2	female	pulmonary tuberculosis	1
Yuexi	3	female	pulmonary tuberculosis	1
Yuexi	4	female	pulmonary tuberculosis	0
Yuexi	5	female	pulmonary tuberculosis	2
Yuexi	6	female	pulmonary tuberculosis	0
Yuexi	7	female	pulmonary tuberculosis	0
Yuexi	8	female	pulmonary tuberculosis	0
Yuexi	9	female	pulmonary tuberculosis	0
Yuexi	10	female	pulmonary tuberculosis	1
Yuexi	11	female	pulmonary tuberculosis	2
Yuexi	12	female	pulmonary tuberculosis	24
Yuexi	13	female	pulmonary tuberculosis	17
Yuexi	14	female	pulmonary tuberculosis	32
Yuexi	15	female	pulmonary tuberculosis	21
Yuexi	16	female	pulmonary tuberculosis	11
Yuexi	17	female	pulmonary tuberculosis	11
Yuexi	18	female	pulmonary tuberculosis	4
Yuexi	19	female	pulmonary tuberculosis	0
Lu	1	male	mumps	0
Lu	2	male	mumps	1
Lu	3	male	mumps	8
Lu	4	male	mumps	6
Lu	5	male	mumps	15
Lu	6	male	mumps	22
Lu	7	male	mumps	26
Lu	8	male	mumps	14
Lu	9	male	mumps	13
Lu	10	male	mumps	5
Lu	11	male	mumps	22
Lu	12	male	mumps	6
Lu	13	male	mumps	1
Lu	14	male	mumps	1
Lu	15	male	mumps	0
Lu	16	male	mumps	0
Lu	17	male	mumps	0
Lu	18	male	mumps	0
Lu	19	male	mumps	0
Shifang	1	male	mumps	0
Shifang	2	male	mumps	3
Shifang	3	male	mumps	4
Shifang	4	male	mumps	8
Shifang	5	male	mumps	6
Shifang	6	male	mumps	10
Shifang	7	male	mumps	5
Shifang	8	male	mumps	3
Shifang	9	male	mumps	3
Shifang	10	male	mumps	7
Shifang	11	male	mumps	7
Shifang	12	male	mumps	0
Shifang	13	male	mumps	2
Shifang	14	male	mumps	2
Shifang	15	male	mumps	0
Shifang	16	male	mumps	0
Shifang	17	male	mumps	0
Shifang	18	male	mumps	0
Shifang	19	male	mumps	0
Yuexi	1	male	mumps	0
Yuexi	2	male	mumps	0
Yuexi	3	male	mumps	0
Yuexi	4	male	mumps	4
Yuexi	5	male	mumps	4
Yuexi	6	male	mumps	8
Yuexi	7	male	mumps	6
Yuexi	8	male	mumps	4
Yuexi	9	male	mumps	4
Yuexi	10	male	mumps	5
Yuexi	11	male	mumps	14
Yuexi	12	male	mumps	2
Yuexi	13	male	mumps	0
Yuexi	14	male	mumps	1
Yuexi	15	male	mumps	1
Yuexi	16	male	mumps	0
Yuexi	17	male	mumps	0
Yuexi	18	male	mumps	0
Yuexi	19	male	mumps	0
Lu	1	female	mumps	0
Lu	2	female	mumps	2
Lu	3	female	mumps	1
Lu	4	female	mumps	6
Lu	5	female	mumps	6
Lu	6	female	mumps	11
Lu	7	female	mumps	18
Lu	8	female	mumps	13
Lu	9	female	mumps	8
Lu	10	female	mumps	4
Lu	11	female	mumps	16
Lu	12	female	mumps	3
Lu	13	female	mumps	3
Lu	14	female	mumps	3
Lu	15	female	mumps	4
Lu	16	female	mumps	0
Lu	17	female	mumps	1
Lu	18	female	mumps	0
Lu	19	female	mumps	0
Shifang	1	female	mumps	0
Shifang	2	female	mumps	1
Shifang	3	female	mumps	3
Shifang	4	female	mumps	2
Shifang	5	female	mumps	3
Shifang	6	female	mumps	8
Shifang	7	female	mumps	6
Shifang	8	female	mumps	4
Shifang	9	female	mumps	1
Shifang	10	female	mumps	1
Shifang	11	female	mumps	7
Shifang	12	female	mumps	1
Shifang	13	female	mumps	0
Shifang	14	female	mumps	3
Shifang	15	female	mumps	1
Shifang	16	female	mumps	1
Shifang	17	female	mumps	2
Shifang	18	female	mumps	0
Shifang	19	female	mumps	0
Yuexi	1	female	mumps	0
Yuexi	2	female	mumps	0
Yuexi	3	female	mumps	1
Yuexi	4	female	mumps	4
Yuexi	5	female	mumps	1
Yuexi	6	female	mumps	3
Yuexi	7	female	mumps	4
Yuexi	8	female	mumps	7
Yuexi	9	female	mumps	6
Yuexi	10	female	mumps	1
Yuexi	11	female	mumps	16
Yuexi	12	female	mumps	3
Yuexi	13	female	mumps	1
Yuexi	14	female	mumps	1
Yuexi	15	female	mumps	0
Yuexi	16	female	mumps	0
Yuexi	17	female	mumps	0
Yuexi	18	female	mumps	0
Yuexi	19	female	mumps	0
Lu	1	male	varicella	7
Lu	2	male	varicella	10
Lu	3	male	varicella	9
Lu	4	male	varicella	12
Lu	5	male	varicella	13
Lu	6	male	varicella	21
Lu	7	male	varicella	19
Lu	8	male	varicella	8
Lu	9	male	varicella	16
Lu	10	male	varicella	7
Lu	11	male	varicella	22
Lu	12	male	varicella	14
Lu	13	male	varicella	1
Lu	14	male	varicella	1
Lu	15	male	varicella	0
Lu	16	male	varicella	0
Lu	17	male	varicella	0
Lu	18	male	varicella	0
Lu	19	male	varicella	0
Shifang	1	male	varicella	4
Shifang	2	male	varicella	5
Shifang	3	male	varicella	7
Shifang	4	male	varicella	12
Shifang	5	male	varicella	13
Shifang	6	male	varicella	12
Shifang	7	male	varicella	8
Shifang	8	male	varicella	6
Shifang	9	male	varicella	2
Shifang	10	male	varicella	1
Shifang	11	male	varicella	5
Shifang	12	male	varicella	11
Shifang	13	male	varicella	4
Shifang	14	male	varicella	14
Shifang	15	male	varicella	0
Shifang	16	male	varicella	0
Shifang	17	male	varicella	0
Shifang	18	male	varicella	1
Shifang	19	male	varicella	0
Yuexi	1	male	varicella	4
Yuexi	2	male	varicella	3
Yuexi	3	male	varicella	0
Yuexi	4	male	varicella	0
Yuexi	5	male	varicella	2
Yuexi	6	male	varicella	3
Yuexi	7	male	varicella	1
Yuexi	8	male	varicella	2
Yuexi	9	male	varicella	3
Yuexi	10	male	varicella	2
Yuexi	11	male	varicella	0
Yuexi	12	male	varicella	6
Yuexi	13	male	varicella	1
Yuexi	14	male	varicella	2
Yuexi	15	male	varicella	0
Yuexi	16	male	varicella	0
Yuexi	17	male	varicella	0
Yuexi	18	male	varicella	0
Yuexi	19	male	varicella	0
Lu	1	female	varicella	3
Lu	2	female	varicella	6
Lu	3	female	varicella	9
Lu	4	female	varicella	7
Lu	5	female	varicella	9
Lu	6	female	varicella	15
Lu	7	female	varicella	16
Lu	8	female	varicella	12
Lu	9	female	varicella	9
Lu	10	female	varicella	8
Lu	11	female	varicella	13
Lu	12	female	varicella	7
Lu	13	female	varicella	7
Lu	14	female	varicella	0
Lu	15	female	varicella	0
Lu	16	female	varicella	0
Lu	17	female	varicella	0
Lu	18	female	varicella	0
Lu	19	female	varicella	0
Shifang	1	female	varicella	3
Shifang	2	female	varicella	6
Shifang	3	female	varicella	13
Shifang	4	female	varicella	9
Shifang	5	female	varicella	10
Shifang	6	female	varicella	10
Shifang	7	female	varicella	7
Shifang	8	female	varicella	8
Shifang	9	female	varicella	2
Shifang	10	female	varicella	1
Shifang	11	female	varicella	6
Shifang	12	female	varicella	9
Shifang	13	female	varicella	6
Shifang	14	female	varicella	11
Shifang	15	female	varicella	1
Shifang	16	female	varicella	0
Shifang	17	female	varicella	0
Shifang	18	female	varicella	0
Shifang	19	female	varicella	0
Yuexi	1	female	varicella	0
Yuexi	2	female	varicella	0
Yuexi	3	female	varicella	2
Yuexi	4	female	varicella	0
Yuexi	5	female	varicella	0
Yuexi	6	female	varicella	0
Yuexi	7	female	varicella	0
Yuexi	8	female	varicella	0
Yuexi	9	female	varicella	0
Yuexi	10	female	varicella	0
Yuexi	11	female	varicella	0
Yuexi	12	female	varicella	0
Yuexi	13	female	varicella	1
Yuexi	14	female	varicella	1
Yuexi	15	female	varicella	0
Yuexi	16	female	varicella	0
Yuexi	17	female	varicella	0
Yuexi	18	female	varicella	0
Yuexi	19	female	varicella	0

## Sheet: 2012 IIDs
DQ	age	gender	disease	number
Lu	1	male	bacillary dysentery	0
Lu	2	male	bacillary dysentery	0
Lu	3	male	bacillary dysentery	0
Lu	4	male	bacillary dysentery	1
Lu	5	male	bacillary dysentery	1
Lu	6	male	bacillary dysentery	1
Lu	7	male	bacillary dysentery	0
Lu	8	male	bacillary dysentery	0
Lu	9	male	bacillary dysentery	0
Lu	10	male	bacillary dysentery	0
Lu	11	male	bacillary dysentery	0
Lu	12	male	bacillary dysentery	0
Lu	13	male	bacillary dysentery	0
Lu	14	male	bacillary dysentery	0
Lu	15	male	bacillary dysentery	0
Lu	16	male	bacillary dysentery	1
Lu	17	male	bacillary dysentery	0
Lu	18	male	bacillary dysentery	0
Lu	19	male	bacillary dysentery	2
Shifang	1	male	bacillary dysentery	0
Shifang	2	male	bacillary dysentery	3
Shifang	3	male	bacillary dysentery	4
Shifang	4	male	bacillary dysentery	2
Shifang	5	male	bacillary dysentery	0
Shifang	6	male	bacillary dysentery	1
Shifang	7	male	bacillary dysentery	0
Shifang	8	male	bacillary dysentery	1
Shifang	9	male	bacillary dysentery	0
Shifang	10	male	bacillary dysentery	1
Shifang	11	male	bacillary dysentery	0
Shifang	12	male	bacillary dysentery	0
Shifang	13	male	bacillary dysentery	0
Shifang	14	male	bacillary dysentery	0
Shifang	15	male	bacillary dysentery	0
Shifang	16	male	bacillary dysentery	0
Shifang	17	male	bacillary dysentery	1
Shifang	18	male	bacillary dysentery	1
Shifang	19	male	bacillary dysentery	0
Yuexi	1	male	bacillary dysentery	12
Yuexi	2	male	bacillary dysentery	20
Yuexi	3	male	bacillary dysentery	10
Yuexi	4	male	bacillary dysentery	4
Yuexi	5	male	bacillary dysentery	5
Yuexi	6	male	bacillary dysentery	0
Yuexi	7	male	bacillary dysentery	0
Yuexi	8	male	bacillary dysentery	1
Yuexi	9	male	bacillary dysentery	2
Yuexi	10	male	bacillary dysentery	2
Yuexi	11	male	bacillary dysentery	3
Yuexi	12	male	bacillary dysentery	5
Yuexi	13	male	bacillary dysentery	2
Yuexi	14	male	bacillary dysentery	13
Yuexi	15	male	bacillary dysentery	13
Yuexi	16	male	bacillary dysentery	8
Yuexi	17	male	bacillary dysentery	6
Yuexi	18	male	bacillary dysentery	13
Yuexi	19	male	bacillary dysentery	5
Lu	1	female	bacillary dysentery	0
Lu	2	female	bacillary dysentery	0
Lu	3	female	bacillary dysentery	0
Lu	4	female	bacillary dysentery	0
Lu	5	female	bacillary dysentery	0
Lu	6	female	bacillary dysentery	1
Lu	7	female	bacillary dysentery	0
Lu	8	female	bacillary dysentery	0
Lu	9	female	bacillary dysentery	0
Lu	10	female	bacillary dysentery	0
Lu	11	female	bacillary dysentery	0
Lu	12	female	bacillary dysentery	1
Lu	13	female	bacillary dysentery	0
Lu	14	female	bacillary dysentery	0
Lu	15	female	bacillary dysentery	0
Lu	16	female	bacillary dysentery	1
Lu	17	female	bacillary dysentery	0
Lu	18	female	bacillary dysentery	1
Lu	19	female	bacillary dysentery	0
Shifang	1	female	bacillary dysentery	1
Shifang	2	female	bacillary dysentery	1
Shifang	3	female	bacillary dysentery	2
Shifang	4	female	bacillary dysentery	1
Shifang	5	female	bacillary dysentery	1
Shifang	6	female	bacillary dysentery	1
Shifang	7	female	bacillary dysentery	0
Shifang	8	female	bacillary dysentery	0
Shifang	9	female	bacillary dysentery	0
Shifang	10	female	bacillary dysentery	0
Shifang	11	female	bacillary dysentery	0
Shifang	12	female	bacillary dysentery	1
Shifang	13	female	bacillary dysentery	2
Shifang	14	female	bacillary dysentery	1
Shifang	15	female	bacillary dysentery	1
Shifang	16	female	bacillary dysentery	0
Shifang	17	female	bacillary dysentery	1
Shifang	18	female	bacillary dysentery	0
Shifang	19	female	bacillary dysentery	0
Yuexi	1	female	bacillary dysentery	2
Yuexi	2	female	bacillary dysentery	10
Yuexi	3	female	bacillary dysentery	9
Yuexi	4	female	bacillary dysentery	3
Yuexi	5	female	bacillary dysentery	3
Yuexi	6	female	bacillary dysentery	1
Yuexi	7	female	bacillary dysentery	1
Yuexi	8	female	bacillary dysentery	0
Yuexi	9	female	bacillary dysentery	2
Yuexi	10	female	bacillary dysentery	1
Yuexi	11	female	bacillary dysentery	3
Yuexi	12	female	bacillary dysentery	3
Yuexi	13	female	bacillary dysentery	8
Yuexi	14	female	bacillary dysentery	15
Yuexi	15	female	bacillary dysentery	14
Yuexi	16	female	bacillary dysentery	12
Yuexi	17	female	bacillary dysentery	13
Yuexi	18	female	bacillary dysentery	12
Yuexi	19	female	bacillary dysentery	3
Lu	1	male	other infectious diarrhea	17
Lu	2	male	other infectious diarrhea	13
Lu	3	male	other infectious diarrhea	1
Lu	4	male	other infectious diarrhea	0
Lu	5	male	other infectious diarrhea	2
Lu	6	male	other infectious diarrhea	2
Lu	7	male	other infectious diarrhea	3
Lu	8	male	other infectious diarrhea	0
Lu	9	male	other infectious diarrhea	0
Lu	10	male	other infectious diarrhea	0
Lu	11	male	other infectious diarrhea	2
Lu	12	male	other infectious diarrhea	1
Lu	13	male	other infectious diarrhea	0
Lu	14	male	other infectious diarrhea	0
Lu	15	male	other infectious diarrhea	5
Lu	16	male	other infectious diarrhea	6
Lu	17	male	other infectious diarrhea	4
Lu	18	male	other infectious diarrhea	0
Lu	19	male	other infectious diarrhea	3
Shifang	1	male	other infectious diarrhea	38
Shifang	2	male	other infectious diarrhea	47
Shifang	3	male	other infectious diarrhea	8
Shifang	4	male	other infectious diarrhea	2
Shifang	5	male	other infectious diarrhea	6
Shifang	6	male	other infectious diarrhea	3
Shifang	7	male	other infectious diarrhea	0
Shifang	8	male	other infectious diarrhea	1
Shifang	9	male	other infectious diarrhea	0
Shifang	10	male	other infectious diarrhea	3
Shifang	11	male	other infectious diarrhea	1
Shifang	12	male	other infectious diarrhea	2
Shifang	13	male	other infectious diarrhea	1
Shifang	14	male	other infectious diarrhea	1
Shifang	15	male	other infectious diarrhea	2
Shifang	16	male	other infectious diarrhea	2
Shifang	17	male	other infectious diarrhea	3
Shifang	18	male	other infectious diarrhea	2
Shifang	19	male	other infectious diarrhea	0
Yuexi	1	male	other infectious diarrhea	1
Yuexi	2	male	other infectious diarrhea	0
Yuexi	3	male	other infectious diarrhea	2
Yuexi	4	male	other infectious diarrhea	1
Yuexi	5	male	other infectious diarrhea	1
Yuexi	6	male	other infectious diarrhea	3
Yuexi	7	male	other infectious diarrhea	1
Yuexi	8	male	other infectious diarrhea	0
Yuexi	9	male	other infectious diarrhea	1
Yuexi	10	male	other infectious diarrhea	1
Yuexi	11	male	other infectious diarrhea	2
Yuexi	12	male	other infectious diarrhea	2
Yuexi	13	male	other infectious diarrhea	1
Yuexi	14	male	other infectious diarrhea	1
Yuexi	15	male	other infectious diarrhea	2
Yuexi	16	male	other infectious diarrhea	2
Yuexi	17	male	other infectious diarrhea	1
Yuexi	18	male	other infectious diarrhea	2
Yuexi	19	male	other infectious diarrhea	1
Lu	1	female	other infectious diarrhea	15
Lu	2	female	other infectious diarrhea	6
Lu	3	female	other infectious diarrhea	1
Lu	4	female	other infectious diarrhea	1
Lu	5	female	other infectious diarrhea	0
Lu	6	female	other infectious diarrhea	1
Lu	7	female	other infectious diarrhea	0
Lu	8	female	other infectious diarrhea	0
Lu	9	female	other infectious diarrhea	1
Lu	10	female	other infectious diarrhea	0
Lu	11	female	other infectious diarrhea	0
Lu	12	female	other infectious diarrhea	0
Lu	13	female	other infectious diarrhea	3
Lu	14	female	other infectious diarrhea	1
Lu	15	female	other infectious diarrhea	2
Lu	16	female	other infectious diarrhea	6
Lu	17	female	other infectious diarrhea	1
Lu	18	female	other infectious diarrhea	5
Lu	19	female	other infectious diarrhea	4
Shifang	1	female	other infectious diarrhea	22
Shifang	2	female	other infectious diarrhea	38
Shifang	3	female	other infectious diarrhea	8
Shifang	4	female	other infectious diarrhea	2
Shifang	5	female	other infectious diarrhea	1
Shifang	6	female	other infectious diarrhea	1
Shifang	7	female	other infectious diarrhea	0
Shifang	8	female	other infectious diarrhea	0
Shifang	9	female	other infectious diarrhea	0
Shifang	10	female	other infectious diarrhea	0
Shifang	11	female	other infectious diarrhea	1
Shifang	12	female	other infectious diarrhea	1
Shifang	13	female	other infectious diarrhea	1
Shifang	14	female	other infectious diarrhea	0
Shifang	15	female	other infectious diarrhea	4
Shifang	16	female	other infectious diarrhea	3
Shifang	17	female	other infectious diarrhea	8
Shifang	18	female	other infectious diarrhea	2
Shifang	19	female	other infectious diarrhea	0
Yuexi	1	female	other infectious diarrhea	0
Yuexi	2	female	other infectious diarrhea	0
Yuexi	3	female	other infectious diarrhea	3
Yuexi	4	female	other infectious diarrhea	0
Yuexi	5	female	other infectious diarrhea	0
Yuexi	6	female	other infectious diarrhea	0
Yuexi	7	female	other infectious diarrhea	1
Yuexi	8	female	other infectious diarrhea	0
Yuexi	9	female	other infectious diarrhea	0
Yuexi	10	female	other infectious diarrhea	0
Yuexi	11	female	other infectious diarrhea	2
Yuexi	12	female	other infectious diarrhea	2
Yuexi	13	female	other infectious diarrhea	1
Yuexi	14	female	other infectious diarrhea	3
Yuexi	15	female	other infectious diarrhea	2
Yuexi	16	female	other infectious diarrhea	2
Yuexi	17	female	other infectious diarrhea	1
Yuexi	18	female	other infectious diarrhea	2
Yuexi	19	female	other infectious diarrhea	0
Lu	1	male	HFMD	6
Lu	2	male	HFMD	46
Lu	3	male	HFMD	35
Lu	4	male	HFMD	27
Lu	5	male	HFMD	9
Lu	6	male	HFMD	5
Lu	7	male	HFMD	5
Lu	8	male	HFMD	3
Lu	9	male	HFMD	1
Lu	10	male	HFMD	0
Lu	11	male	HFMD	1
Lu	12	male	HFMD	0
Lu	13	male	HFMD	0
Lu	14	male	HFMD	0
Lu	15	male	HFMD	0
Lu	16	male	HFMD	0
Lu	17	male	HFMD	0
Lu	18	male	HFMD	0
Lu	19	male	HFMD	0
Shifang	1	male	HFMD	28
Shifang	2	male	HFMD	98
Shifang	3	male	HFMD	76
Shifang	4	male	HFMD	40
Shifang	5	male	HFMD	20
Shifang	6	male	HFMD	8
Shifang	7	male	HFMD	6
Shifang	8	male	HFMD	0
Shifang	9	male	HFMD	1
Shifang	10	male	HFMD	0
Shifang	11	male	HFMD	0
Shifang	12	male	HFMD	0
Shifang	13	male	HFMD	0
Shifang	14	male	HFMD	0
Shifang	15	male	HFMD	0
Shifang	16	male	HFMD	0
Shifang	17	male	HFMD	0
Shifang	18	male	HFMD	0
Shifang	19	male	HFMD	0
Yuexi	1	male	HFMD	1
Yuexi	2	male	HFMD	1
Yuexi	3	male	HFMD	1
Yuexi	4	male	HFMD	0
Yuexi	5	male	HFMD	0
Yuexi	6	male	HFMD	0
Yuexi	7	male	HFMD	2
Yuexi	8	male	HFMD	0
Yuexi	9	male	HFMD	0
Yuexi	10	male	HFMD	0
Yuexi	11	male	HFMD	0
Yuexi	12	male	HFMD	0
Yuexi	13	male	HFMD	0
Yuexi	14	male	HFMD	0
Yuexi	15	male	HFMD	0
Yuexi	16	male	HFMD	0
Yuexi	17	male	HFMD	0
Yuexi	18	male	HFMD	0
Yuexi	19	male	HFMD	0
Lu	1	female	HFMD	4
Lu	2	female	HFMD	23
Lu	3	female	HFMD	25
Lu	4	female	HFMD	13
Lu	5	female	HFMD	9
Lu	6	female	HFMD	4
Lu	7	female	HFMD	1
Lu	8	female	HFMD	0
Lu	9	female	HFMD	0
Lu	10	female	HFMD	0
Lu	11	female	HFMD	0
Lu	12	female	HFMD	0
Lu	13	female	HFMD	0
Lu	14	female	HFMD	1
Lu	15	female	HFMD	0
Lu	16	female	HFMD	0
Lu	17	female	HFMD	0
Lu	18	female	HFMD	0
Lu	19	female	HFMD	0
Shifang	1	female	HFMD	9
Shifang	2	female	HFMD	49
Shifang	3	female	HFMD	40
Shifang	4	female	HFMD	25
Shifang	5	female	HFMD	11
Shifang	6	female	HFMD	9
Shifang	7	female	HFMD	1
Shifang	8	female	HFMD	0
Shifang	9	female	HFMD	0
Shifang	10	female	HFMD	0
Shifang	11	female	HFMD	0
Shifang	12	female	HFMD	1
Shifang	13	female	HFMD	0
Shifang	14	female	HFMD	0
Shifang	15	female	HFMD	0
Shifang	16	female	HFMD	0
Shifang	17	female	HFMD	0
Shifang	18	female	HFMD	0
Shifang	19	female	HFMD	0
Yuexi	1	female	HFMD	0
Yuexi	2	female	HFMD	4
Yuexi	3	female	HFMD	1
Yuexi	4	female	HFMD	1
Yuexi	5	female	HFMD	0
Yuexi	6	female	HFMD	0
Yuexi	7	female	HFMD	0
Yuexi	8	female	HFMD	0
Yuexi	9	female	HFMD	0
Yuexi	10	female	HFMD	0
Yuexi	11	female	HFMD	0
Yuexi	12	female	HFMD	0
Yuexi	13	female	HFMD	0
Yuexi	14	female	HFMD	0
Yuexi	15	female	HFMD	0
Yuexi	16	female	HFMD	0
Yuexi	17	female	HFMD	0
Yuexi	18	female	HFMD	0
Yuexi	19	female	HFMD	0

## Sheet: 2013 RIDs
DQ	age	gender	disease	number
Lu	1	male	pulmonary tuberculosis	0
Lu	2	male	pulmonary tuberculosis	0
Lu	3	male	pulmonary tuberculosis	0
Lu	4	male	pulmonary tuberculosis	0
Lu	5	male	pulmonary tuberculosis	0
Lu	6	male	pulmonary tuberculosis	0
Lu	7	male	pulmonary tuberculosis	0
Lu	8	male	pulmonary tuberculosis	0
Lu	9	male	pulmonary tuberculosis	0
Lu	10	male	pulmonary tuberculosis	1
Lu	11	male	pulmonary tuberculosis	1
Lu	12	male	pulmonary tuberculosis	16
Lu	13	male	pulmonary tuberculosis	16
Lu	14	male	pulmonary tuberculosis	43
Lu	15	male	pulmonary tuberculosis	84
Lu	16	male	pulmonary tuberculosis	95
Lu	17	male	pulmonary tuberculosis	192
Lu	18	male	pulmonary tuberculosis	84
Lu	19	male	pulmonary tuberculosis	32
Shifang	1	male	pulmonary tuberculosis	0
Shifang	2	male	pulmonary tuberculosis	0
Shifang	3	male	pulmonary tuberculosis	0
Shifang	4	male	pulmonary tuberculosis	0
Shifang	5	male	pulmonary tuberculosis	0
Shifang	6	male	pulmonary tuberculosis	0
Shifang	7	male	pulmonary tuberculosis	0
Shifang	8	male	pulmonary tuberculosis	0
Shifang	9	male	pulmonary tuberculosis	0
Shifang	10	male	pulmonary tuberculosis	0
Shifang	11	male	pulmonary tuberculosis	0
Shifang	12	male	pulmonary tuberculosis	5
Shifang	13	male	pulmonary tuberculosis	18
Shifang	14	male	pulmonary tuberculosis	21
Shifang	15	male	pulmonary tuberculosis	32
Shifang	16	male	pulmonary tuberculosis	48
Shifang	17	male	pulmonary tuberculosis	37
Shifang	18	male	pulmonary tuberculosis	34
Shifang	19	male	pulmonary tuberculosis	15
Yuexi	1	male	pulmonary tuberculosis	2
Yuexi	2	male	pulmonary tuberculosis	2
Yuexi	3	male	pulmonary tuberculosis	2
Yuexi	4	male	pulmonary tuberculosis	1
Yuexi	5	male	pulmonary tuberculosis	3
Yuexi	6	male	pulmonary tuberculosis	0
Yuexi	7	male	pulmonary tuberculosis	2
Yuexi	8	male	pulmonary tuberculosis	1
Yuexi	9	male	pulmonary tuberculosis	0
Yuexi	10	male	pulmonary tuberculosis	0
Yuexi	11	male	pulmonary tuberculosis	5
Yuexi	12	male	pulmonary tuberculosis	27
Yuexi	13	male	pulmonary tuberculosis	31
Yuexi	14	male	pulmonary tuberculosis	79
Yuexi	15	male	pulmonary tuberculosis	37
Yuexi	16	male	pulmonary tuberculosis	29
Yuexi	17	male	pulmonary tuberculosis	17
Yuexi	18	male	pulmonary tuberculosis	16
Yuexi	19	male	pulmonary tuberculosis	3
Lu	1	female	pulmonary tuberculosis	0
Lu	2	female	pulmonary tuberculosis	0
Lu	3	female	pulmonary tuberculosis	0
Lu	4	female	pulmonary tuberculosis	0
Lu	5	female	pulmonary tuberculosis	0
Lu	6	female	pulmonary tuberculosis	0
Lu	7	female	pulmonary tuberculosis	0
Lu	8	female	pulmonary tuberculosis	0
Lu	9	female	pulmonary tuberculosis	0
Lu	10	female	pulmonary tuberculosis	0
Lu	11	female	pulmonary tuberculosis	1
Lu	12	female	pulmonary tuberculosis	9
Lu	13	female	pulmonary tuberculosis	19
Lu	14	female	pulmonary tuberculosis	25
Lu	15	female	pulmonary tuberculosis	33
Lu	16	female	pulmonary tuberculosis	31
Lu	17	female	pulmonary tuberculosis	34
Lu	18	female	pulmonary tuberculosis	15
Lu	19	female	pulmonary tuberculosis	7
Shifang	1	female	pulmonary tuberculosis	0
Shifang	2	female	pulmonary tuberculosis	0
Shifang	3	female	pulmonary tuberculosis	0
Shifang	4	female	pulmonary tuberculosis	0
Shifang	5	female	pulmonary tuberculosis	0
Shifang	6	female	pulmonary tuberculosis	0
Shifang	7	female	pulmonary tuberculosis	0
Shifang	8	female	pulmonary tuberculosis	0
Shifang	9	female	pulmonary tuberculosis	0
Shifang	10	female	pulmonary tuberculosis	0
Shifang	11	female	pulmonary tuberculosis	0
Shifang	12	female	pulmonary tuberculosis	6
Shifang	13	female	pulmonary tuberculosis	11
Shifang	14	female	pulmonary tuberculosis	21
Shifang	15	female	pulmonary tuberculosis	17
Shifang	16	female	pulmonary tuberculosis	11
Shifang	17	female	pulmonary tuberculosis	26
Shifang	18	female	pulmonary tuberculosis	15
Shifang	19	female	pulmonary tuberculosis	6
Yuexi	1	female	pulmonary tuberculosis	0
Yuexi	2	female	pulmonary tuberculosis	2
Yuexi	3	female	pulmonary tuberculosis	1
Yuexi	4	female	pulmonary tuberculosis	0
Yuexi	5	female	pulmonary tuberculosis	0
Yuexi	6	female	pulmonary tuberculosis	0
Yuexi	7	female	pulmonary tuberculosis	3
Yuexi	8	female	pulmonary tuberculosis	0
Yuexi	9	female	pulmonary tuberculosis	0
Yuexi	10	female	pulmonary tuberculosis	0
Yuexi	11	female	pulmonary tuberculosis	2
Yuexi	12	female	pulmonary tuberculosis	25
Yuexi	13	female	pulmonary tuberculosis	30
Yuexi	14	female	pulmonary tuberculosis	33
Yuexi	15	female	pulmonary tuberculosis	15
Yuexi	16	female	pulmonary tuberculosis	6
Yuexi	17	female	pulmonary tuberculosis	9
Yuexi	18	female	pulmonary tuberculosis	10
Yuexi	19	female	pulmonary tuberculosis	0
Lu	1	male	mumps	0
Lu	2	male	mumps	2
Lu	3	male	mumps	5
Lu	4	male	mumps	3
Lu	5	male	mumps	8
Lu	6	male	mumps	13
Lu	7	male	mumps	5
Lu	8	male	mumps	15
Lu	9	male	mumps	13
Lu	10	male	mumps	12
Lu	11	male	mumps	21
Lu	12	male	mumps	2
Lu	13	male	mumps	1
Lu	14	male	mumps	0
Lu	15	male	mumps	3
Lu	16	male	mumps	0
Lu	17	male	mumps	0
Lu	18	male	mumps	0
Lu	19	male	mumps	0
Shifang	1	male	mumps	0
Shifang	2	male	mumps	0
Shifang	3	male	mumps	4
Shifang	4	male	mumps	7
Shifang	5	male	mumps	4
Shifang	6	male	mumps	8
Shifang	7	male	mumps	7
Shifang	8	male	mumps	7
Shifang	9	male	mumps	2
Shifang	10	male	mumps	4
Shifang	11	male	mumps	9
Shifang	12	male	mumps	0
Shifang	13	male	mumps	1
Shifang	14	male	mumps	3
Shifang	15	male	mumps	1
Shifang	16	male	mumps	0
Shifang	17	male	mumps	0
Shifang	18	male	mumps	0
Shifang	19	male	mumps	0
Yuexi	1	male	mumps	1
Yuexi	2	male	mumps	0
Yuexi	3	male	mumps	1
Yuexi	4	male	mumps	1
Yuexi	5	male	mumps	3
Yuexi	6	male	mumps	3
Yuexi	7	male	mumps	2
Yuexi	8	male	mumps	3
Yuexi	9	male	mumps	0
Yuexi	10	male	mumps	0
Yuexi	11	male	mumps	0
Yuexi	12	male	mumps	1
Yuexi	13	male	mumps	1
Yuexi	14	male	mumps	1
Yuexi	15	male	mumps	0
Yuexi	16	male	mumps	0
Yuexi	17	male	mumps	0
Yuexi	18	male	mumps	0
Yuexi	19	male	mumps	0
Lu	1	female	mumps	0
Lu	2	female	mumps	1
Lu	3	female	mumps	6
Lu	4	female	mumps	3
Lu	5	female	mumps	9
Lu	6	female	mumps	5
Lu	7	female	mumps	5
Lu	8	female	mumps	6
Lu	9	female	mumps	6
Lu	10	female	mumps	7
Lu	11	female	mumps	12
Lu	12	female	mumps	3
Lu	13	female	mumps	0
Lu	14	female	mumps	3
Lu	15	female	mumps	1
Lu	16	female	mumps	0
Lu	17	female	mumps	1
Lu	18	female	mumps	0
Lu	19	female	mumps	0
Shifang	1	female	mumps	0
Shifang	2	female	mumps	1
Shifang	3	female	mumps	2
Shifang	4	female	mumps	4
Shifang	5	female	mumps	4
Shifang	6	female	mumps	10
Shifang	7	female	mumps	9
Shifang	8	female	mumps	5
Shifang	9	female	mumps	2
Shifang	10	female	mumps	2
Shifang	11	female	mumps	12
Shifang	12	female	mumps	1
Shifang	13	female	mumps	1
Shifang	14	female	mumps	1
Shifang	15	female	mumps	2
Shifang	16	female	mumps	1
Shifang	17	female	mumps	0
Shifang	18	female	mumps	0
Shifang	19	female	mumps	0
Yuexi	1	female	mumps	0
Yuexi	2	female	mumps	0
Yuexi	3	female	mumps	0
Yuexi	4	female	mumps	0
Yuexi	5	female	mumps	0
Yuexi	6	female	mumps	0
Yuexi	7	female	mumps	0
Yuexi	8	female	mumps	1
Yuexi	9	female	mumps	0
Yuexi	10	female	mumps	0
Yuexi	11	female	mumps	3
Yuexi	12	female	mumps	1
Yuexi	13	female	mumps	0
Yuexi	14	female	mumps	0
Yuexi	15	female	mumps	0
Yuexi	16	female	mumps	0
Yuexi	17	female	mumps	0
Yuexi	18	female	mumps	0
Yuexi	19	female	mumps	0
Lu	1	male	varicella	0
Lu	2	male	varicella	0
Lu	3	male	varicella	0
Lu	4	male	varicella	0
Lu	5	male	varicella	0
Lu	6	male	varicella	0
Lu	7	male	varicella	0
Lu	8	male	varicella	0
Lu	9	male	varicella	0
Lu	10	male	varicella	0
Lu	11	male	varicella	0
Lu	12	male	varicella	0
Lu	13	male	varicella	0
Lu	14	male	varicella	0
Lu	15	male	varicella	0
Lu	16	male	varicella	0
Lu	17	male	varicella	0
Lu	18	male	varicella	0
Lu	19	male	varicella	0
Shifang	1	male	varicella	4
Shifang	2	male	varicella	5
Shifang	3	male	varicella	9
Shifang	4	male	varicella	20
Shifang	5	male	varicella	17
Shifang	6	male	varicella	16
Shifang	7	male	varicella	23
Shifang	8	male	varicella	8
Shifang	9	male	varicella	2
Shifang	10	male	varicella	1
Shifang	11	male	varicella	9
Shifang	12	male	varicella	13
Shifang	13	male	varicella	5
Shifang	14	male	varicella	7
Shifang	15	male	varicella	1
Shifang	16	male	varicella	0
Shifang	17	male	varicella	0
Shifang	18	male	varicella	0
Shifang	19	male	varicella	0
Yuexi	1	male	varicella	4
Yuexi	2	male	varicella	0
Yuexi	3	male	varicella	0
Yuexi	4	male	varicella	1
Yuexi	5	male	varicella	2
Yuexi	6	male	varicella	3
Yuexi	7	male	varicella	3
Yuexi	8	male	varicella	4
Yuexi	9	male	varicella	3
Yuexi	10	male	varicella	1
Yuexi	11	male	varicella	1
Yuexi	12	male	varicella	1
Yuexi	13	male	varicella	1
Yuexi	14	male	varicella	2
Yuexi	15	male	varicella	0
Yuexi	16	male	varicella	0
Yuexi	17	male	varicella	0
Yuexi	18	male	varicella	0
Yuexi	19	male	varicella	0
Lu	1	female	varicella	0
Lu	2	female	varicella	0
Lu	3	female	varicella	0
Lu	4	female	varicella	0
Lu	5	female	varicella	0
Lu	6	female	varicella	0
Lu	7	female	varicella	0
Lu	8	female	varicella	0
Lu	9	female	varicella	0
Lu	10	female	varicella	0
Lu	11	female	varicella	0
Lu	12	female	varicella	0
Lu	13	female	varicella	0
Lu	14	female	varicella	0
Lu	15	female	varicella	0
Lu	16	female	varicella	0
Lu	17	female	varicella	0
Lu	18	female	varicella	0
Lu	19	female	varicella	0
Shifang	1	female	varicella	3
Shifang	2	female	varicella	6
Shifang	3	female	varicella	8
Shifang	4	female	varicella	13
Shifang	5	female	varicella	12
Shifang	6	female	varicella	16
Shifang	7	female	varicella	13
Shifang	8	female	varicella	8
Shifang	9	female	varicella	1
Shifang	10	female	varicella	4
Shifang	11	female	varicella	4
Shifang	12	female	varicella	5
Shifang	13	female	varicella	4
Shifang	14	female	varicella	16
Shifang	15	female	varicella	1
Shifang	16	female	varicella	0
Shifang	17	female	varicella	0
Shifang	18	female	varicella	0
Shifang	19	female	varicella	0
Yuexi	1	female	varicella	1
Yuexi	2	female	varicella	0
Yuexi	3	female	varicella	0
Yuexi	4	female	varicella	1
Yuexi	5	female	varicella	2
Yuexi	6	female	varicella	1
Yuexi	7	female	varicella	3
Yuexi	8	female	varicella	1
Yuexi	9	female	varicella	1
Yuexi	10	female	varicella	1
Yuexi	11	female	varicella	2
Yuexi	12	female	varicella	1
Yuexi	13	female	varicella	1
Yuexi	14	female	varicella	2
Yuexi	15	female	varicella	0
Yuexi	16	female	varicella	0
Yuexi	17	female	varicella	0
Yuexi	18	female	varicella	0
Yuexi	19	female	varicella	0

## Sheet: 2013 IIDs
DQ	age	gender	disease	number
Lu	1	male	bacillary dysentery	1
Lu	2	male	bacillary dysentery	2
Lu	3	male	bacillary dysentery	0
Lu	4	male	bacillary dysentery	0
Lu	5	male	bacillary dysentery	1
Lu	6	male	bacillary dysentery	0
Lu	7	male	bacillary dysentery	0
Lu	8	male	bacillary dysentery	0
Lu	9	male	bacillary dysentery	0
Lu	10	male	bacillary dysentery	0
Lu	11	male	bacillary dysentery	0
Lu	12	male	bacillary dysentery	0
Lu	13	male	bacillary dysentery	0
Lu	14	male	bacillary dysentery	0
Lu	15	male	bacillary dysentery	1
Lu	16	male	bacillary dysentery	2
Lu	17	male	bacillary dysentery	0
Lu	18	male	bacillary dysentery	0
Lu	19	male	bacillary dysentery	0
Shifang	1	male	bacillary dysentery	0
Shifang	2	male	bacillary dysentery	0
Shifang	3	male	bacillary dysentery	0
Shifang	4	male	bacillary dysentery	0
Shifang	5	male	bacillary dysentery	0
Shifang	6	male	bacillary dysentery	0
Shifang	7	male	bacillary dysentery	0
Shifang	8	male	bacillary dysentery	0
Shifang	9	male	bacillary dysentery	0
Shifang	10	male	bacillary dysentery	0
Shifang	11	male	bacillary dysentery	0
Shifang	12	male	bacillary dysentery	1
Shifang	13	male	bacillary dysentery	0
Shifang	14	male	bacillary dysentery	0
Shifang	15	male	bacillary dysentery	0
Shifang	16	male	bacillary dysentery	0
Shifang	17	male	bacillary dysentery	0
Shifang	18	male	bacillary dysentery	0
Shifang	19	male	bacillary dysentery	0
Yuexi	1	male	bacillary dysentery	6
Yuexi	2	male	bacillary dysentery	14
Yuexi	3	male	bacillary dysentery	7
Yuexi	4	male	bacillary dysentery	7
Yuexi	5	male	bacillary dysentery	4
Yuexi	6	male	bacillary dysentery	4
Yuexi	7	male	bacillary dysentery	1
Yuexi	8	male	bacillary dysentery	1
Yuexi	9	male	bacillary dysentery	3
Yuexi	10	male	bacillary dysentery	0
Yuexi	11	male	bacillary dysentery	2
Yuexi	12	male	bacillary dysentery	1
Yuexi	13	male	bacillary dysentery	5
Yuexi	14	male	bacillary dysentery	6
Yuexi	15	male	bacillary dysentery	5
Yuexi	16	male	bacillary dysentery	3
Yuexi	17	male	bacillary dysentery	3
Yuexi	18	male	bacillary dysentery	6
Yuexi	19	male	bacillary dysentery	1
Lu	1	female	bacillary dysentery	2
Lu	2	female	bacillary dysentery	0
Lu	3	female	bacillary dysentery	0
Lu	4	female	bacillary dysentery	0
Lu	5	female	bacillary dysentery	0
Lu	6	female	bacillary dysentery	0
Lu	7	female	bacillary dysentery	0
Lu	8	female	bacillary dysentery	0
Lu	9	female	bacillary dysentery	0
Lu	10	female	bacillary dysentery	1
Lu	11	female	bacillary dysentery	0
Lu	12	female	bacillary dysentery	0
Lu	13	female	bacillary dysentery	0
Lu	14	female	bacillary dysentery	0
Lu	15	female	bacillary dysentery	1
Lu	16	female	bacillary dysentery	0
Lu	17	female	bacillary dysentery	0
Lu	18	female	bacillary dysentery	2
Lu	19	female	bacillary dysentery	0
Shifang	1	female	bacillary dysentery	0
Shifang	2	female	bacillary dysentery	0
Shifang	3	female	bacillary dysentery	0
Shifang	4	female	bacillary dysentery	0
Shifang	5	female	bacillary dysentery	0
Shifang	6	female	bacillary dysentery	0
Shifang	7	female	bacillary dysentery	0
Shifang	8	female	bacillary dysentery	0
Shifang	9	female	bacillary dysentery	0
Shifang	10	female	bacillary dysentery	0
Shifang	11	female	bacillary dysentery	0
Shifang	12	female	bacillary dysentery	0
Shifang	13	female	bacillary dysentery	0
Shifang	14	female	bacillary dysentery	1
Shifang	15	female	bacillary dysentery	0
Shifang	16	female	bacillary dysentery	0
Shifang	17	female	bacillary dysentery	0
Shifang	18	female	bacillary dysentery	0
Shifang	19	female	bacillary dysentery	0
Yuexi	1	female	bacillary dysentery	3
Yuexi	2	female	bacillary dysentery	8
Yuexi	3	female	bacillary dysentery	5
Yuexi	4	female	bacillary dysentery	5
Yuexi	5	female	bacillary dysentery	0
Yuexi	6	female	bacillary dysentery	2
Yuexi	7	female	bacillary dysentery	1
Yuexi	8	female	bacillary dysentery	0
Yuexi	9	female	bacillary dysentery	2
Yuexi	10	female	bacillary dysentery	0
Yuexi	11	female	bacillary dysentery	3
Yuexi	12	female	bacillary dysentery	2
Yuexi	13	female	bacillary dysentery	3
Yuexi	14	female	bacillary dysentery	11
Yuexi	15	female	bacillary dysentery	9
Yuexi	16	female	bacillary dysentery	5
Yuexi	17	female	bacillary dysentery	6
Yuexi	18	female	bacillary dysentery	5
Yuexi	19	female	bacillary dysentery	4
Lu	1	male	other infectious diarrhea	23
Lu	2	male	other infectious diarrhea	8
Lu	3	male	other infectious diarrhea	6
Lu	4	male	other infectious diarrhea	1
Lu	5	male	other infectious diarrhea	3
Lu	6	male	other infectious diarrhea	1
Lu	7	male	other infectious diarrhea	3
Lu	8	male	other infectious diarrhea	1
Lu	9	male	other infectious diarrhea	0
Lu	10	male	other infectious diarrhea	0
Lu	11	male	other infectious diarrhea	0
Lu	12	male	other infectious diarrhea	0
Lu	13	male	other infectious diarrhea	0
Lu	14	male	other infectious diarrhea	4
Lu	15	male	other infectious diarrhea	7
Lu	16	male	other infectious diarrhea	1
Lu	17	male	other infectious diarrhea	5
Lu	18	male	other infectious diarrhea	7
Lu	19	male	other infectious diarrhea	5
Shifang	1	male	other infectious diarrhea	56
Shifang	2	male	other infectious diarrhea	77
Shifang	3	male	other infectious diarrhea	23
Shifang	4	male	other infectious diarrhea	5
Shifang	5	male	other infectious diarrhea	8
Shifang	6	male	other infectious diarrhea	3
Shifang	7	male	other infectious diarrhea	3
Shifang	8	male	other infectious diarrhea	2
Shifang	9	male	other infectious diarrhea	1
Shifang	10	male	other infectious diarrhea	1
Shifang	11	male	other infectious diarrhea	3
Shifang	12	male	other infectious diarrhea	2
Shifang	13	male	other infectious diarrhea	0
Shifang	14	male	other infectious diarrhea	4
Shifang	15	male	other infectious diarrhea	3
Shifang	16	male	other infectious diarrhea	5
Shifang	17	male	other infectious diarrhea	2
Shifang	18	male	other infectious diarrhea	1
Shifang	19	male	other infectious diarrhea	2
Yuexi	1	male	other infectious diarrhea	8
Yuexi	2	male	other infectious diarrhea	5
Yuexi	3	male	other infectious diarrhea	0
Yuexi	4	male	other infectious diarrhea	0
Yuexi	5	male	other infectious diarrhea	0
Yuexi	6	male	other infectious diarrhea	2
Yuexi	7	male	other infectious diarrhea	2
Yuexi	8	male	other infectious diarrhea	0
Yuexi	9	male	other infectious diarrhea	0
Yuexi	10	male	other infectious diarrhea	1
Yuexi	11	male	other infectious diarrhea	0
Yuexi	12	male	other infectious diarrhea	0
Yuexi	13	male	other infectious diarrhea	1
Yuexi	14	male	other infectious diarrhea	1
Yuexi	15	male	other infectious diarrhea	0
Yuexi	16	male	other infectious diarrhea	1
Yuexi	17	male	other infectious diarrhea	0
Yuexi	18	male	other infectious diarrhea	1
Yuexi	19	male	other infectious diarrhea	1
Lu	1	female	other infectious diarrhea	11
Lu	2	female	other infectious diarrhea	4
Lu	3	female	other infectious diarrhea	4
Lu	4	female	other infectious diarrhea	0
Lu	5	female	other infectious diarrhea	0
Lu	6	female	other infectious diarrhea	1
Lu	7	female	other infectious diarrhea	0
Lu	8	female	other infectious diarrhea	0
Lu	9	female	other infectious diarrhea	0
Lu	10	female	other infectious diarrhea	1
Lu	11	female	other infectious diarrhea	0
Lu	12	female	other infectious diarrhea	1
Lu	13	female	other infectious diarrhea	2
Lu	14	female	other infectious diarrhea	3
Lu	15	female	other infectious diarrhea	7
Lu	16	female	other infectious diarrhea	6
Lu	17	female	other infectious diarrhea	4
Lu	18	female	other infectious diarrhea	8
Lu	19	female	other infectious diarrhea	5
Shifang	1	female	other infectious diarrhea	39
Shifang	2	female	other infectious diarrhea	40
Shifang	3	female	other infectious diarrhea	7
Shifang	4	female	other infectious diarrhea	2
Shifang	5	female	other infectious diarrhea	4
Shifang	6	female	other infectious diarrhea	4
Shifang	7	female	other infectious diarrhea	1
Shifang	8	female	other infectious diarrhea	3
Shifang	9	female	other infectious diarrhea	1
Shifang	10	female	other infectious diarrhea	1
Shifang	11	female	other infectious diarrhea	0
Shifang	12	female	other infectious diarrhea	0
Shifang	13	female	other infectious diarrhea	0
Shifang	14	female	other infectious diarrhea	2
Shifang	15	female	other infectious diarrhea	1
Shifang	16	female	other infectious diarrhea	4
Shifang	17	female	other infectious diarrhea	2
Shifang	18	female	other infectious diarrhea	4
Shifang	19	female	other infectious diarrhea	1
Yuexi	1	female	other infectious diarrhea	5
Yuexi	2	female	other infectious diarrhea	4
Yuexi	3	female	other infectious diarrhea	0
Yuexi	4	female	other infectious diarrhea	0
Yuexi	5	female	other infectious diarrhea	0
Yuexi	6	female	other infectious diarrhea	2
Yuexi	7	female	other infectious diarrhea	0
Yuexi	8	female	other infectious diarrhea	0
Yuexi	9	female	other infectious diarrhea	0
Yuexi	10	female	other infectious diarrhea	0
Yuexi	11	female	other infectious diarrhea	0
Yuexi	12	female	other infectious diarrhea	1
Yuexi	13	female	other infectious diarrhea	2
Yuexi	14	female	other infectious diarrhea	3
Yuexi	15	female	other infectious diarrhea	0
Yuexi	16	female	other infectious diarrhea	2
Yuexi	17	female	other infectious diarrhea	3
Yuexi	18	female	other infectious diarrhea	0
Yuexi	19	female	other infectious diarrhea	1
Lu	1	male	HFMD	10
Lu	2	male	HFMD	23
Lu	3	male	HFMD	15
Lu	4	male	HFMD	18
Lu	5	male	HFMD	6
Lu	6	male	HFMD	3
Lu	7	male	HFMD	2
Lu	8	male	HFMD	0
Lu	9	male	HFMD	0
Lu	10	male	HFMD	0
Lu	11	male	HFMD	0
Lu	12	male	HFMD	0
Lu	13	male	HFMD	0
Lu	14	male	HFMD	0
Lu	15	male	HFMD	0
Lu	16	male	HFMD	0
Lu	17	male	HFMD	0
Lu	18	male	HFMD	0
Lu	19	male	HFMD	0
Shifang	1	male	HFMD	7
Shifang	2	male	HFMD	75
Shifang	3	male	HFMD	67
Shifang	4	male	HFMD	33
Shifang	5	male	HFMD	11
Shifang	6	male	HFMD	4
Shifang	7	male	HFMD	5
Shifang	8	male	HFMD	0
Shifang	9	male	HFMD	1
Shifang	10	male	HFMD	1
Shifang	11	male	HFMD	2
Shifang	12	male	HFMD	0
Shifang	13	male	HFMD	0
Shifang	14	male	HFMD	0
Shifang	15	male	HFMD	0
Shifang	16	male	HFMD	0
Shifang	17	male	HFMD	0
Shifang	18	male	HFMD	0
Shifang	19	male	HFMD	0
Yuexi	1	male	HFMD	1
Yuexi	2	male	HFMD	1
Yuexi	3	male	HFMD	0
Yuexi	4	male	HFMD	1
Yuexi	5	male	HFMD	0
Yuexi	6	male	HFMD	0
Yuexi	7	male	HFMD	0
Yuexi	8	male	HFMD	0
Yuexi	9	male	HFMD	0
Yuexi	10	male	HFMD	0
Yuexi	11	male	HFMD	1
Yuexi	12	male	HFMD	0
Yuexi	13	male	HFMD	0
Yuexi	14	male	HFMD	0
Yuexi	15	male	HFMD	0
Yuexi	16	male	HFMD	0
Yuexi	17	male	HFMD	0
Yuexi	18	male	HFMD	0
Yuexi	19	male	HFMD	0
Lu	1	female	HFMD	5
Lu	2	female	HFMD	21
Lu	3	female	HFMD	17
Lu	4	female	HFMD	10
Lu	5	female	HFMD	11
Lu	6	female	HFMD	4
Lu	7	female	HFMD	1
Lu	8	female	HFMD	1
Lu	9	female	HFMD	0
Lu	10	female	HFMD	0
Lu	11	female	HFMD	0
Lu	12	female	HFMD	0
Lu	13	female	HFMD	0
Lu	14	female	HFMD	0
Lu	15	female	HFMD	0
Lu	16	female	HFMD	0
Lu	17	female	HFMD	0
Lu	18	female	HFMD	0
Lu	19	female	HFMD	0
Shifang	1	female	HFMD	8
Shifang	2	female	HFMD	51
Shifang	3	female	HFMD	49
Shifang	4	female	HFMD	21
Shifang	5	female	HFMD	4
Shifang	6	female	HFMD	0
Shifang	7	female	HFMD	1
Shifang	8	female	HFMD	1
Shifang	9	female	HFMD	0
Shifang	10	female	HFMD	0
Shifang	11	female	HFMD	1
Shifang	12	female	HFMD	1
Shifang	13	female	HFMD	0
Shifang	14	female	HFMD	1
Shifang	15	female	HFMD	0
Shifang	16	female	HFMD	0
Shifang	17	female	HFMD	0
Shifang	18	female	HFMD	0
Shifang	19	female	HFMD	0
Yuexi	1	female	HFMD	0
Yuexi	2	female	HFMD	3
Yuexi	3	female	HFMD	0
Yuexi	4	female	HFMD	0
Yuexi	5	female	HFMD	0
Yuexi	6	female	HFMD	0
Yuexi	7	female	HFMD	0
Yuexi	8	female	HFMD	0
Yuexi	9	female	HFMD	0
Yuexi	10	female	HFMD	0
Yuexi	11	female	HFMD	0
Yuexi	12	female	HFMD	0
Yuexi	13	female	HFMD	0
Yuexi	14	female	HFMD	0
Yuexi	15	female	HFMD	0
Yuexi	16	female	HFMD	0
Yuexi	17	female	HFMD	0
Yuexi	18	female	HFMD	0
Yuexi	19	female	HFMD	0

## Sheet: 2014 RIDs
DQ	age	gender	disease	number
Lu	1	male	pulmonary tuberculosis	0
Lu	2	male	pulmonary tuberculosis	0
Lu	3	male	pulmonary tuberculosis	0
Lu	4	male	pulmonary tuberculosis	0
Lu	5	male	pulmonary tuberculosis	0
Lu	6	male	pulmonary tuberculosis	0
Lu	7	male	pulmonary tuberculosis	0
Lu	8	male	pulmonary tuberculosis	0
Lu	9	male	pulmonary tuberculosis	0
Lu	10	male	pulmonary tuberculosis	0
Lu	11	male	pulmonary tuberculosis	1
Lu	12	male	pulmonary tuberculosis	10
Lu	13	male	pulmonary tuberculosis	13
Lu	14	male	pulmonary tuberculosis	32
Lu	15	male	pulmonary tuberculosis	51
Lu	16	male	pulmonary tuberculosis	72
Lu	17	male	pulmonary tuberculosis	124
Lu	18	male	pulmonary tuberculosis	74
Lu	19	male	pulmonary tuberculosis	24
Shifang	1	male	pulmonary tuberculosis	0
Shifang	2	male	pulmonary tuberculosis	0
Shifang	3	male	pulmonary tuberculosis	0
Shifang	4	male	pulmonary tuberculosis	0
Shifang	5	male	pulmonary tuberculosis	0
Shifang	6	male	pulmonary tuberculosis	0
Shifang	7	male	pulmonary tuberculosis	0
Shifang	8	male	pulmonary tuberculosis	0
Shifang	9	male	pulmonary tuberculosis	0
Shifang	10	male	pulmonary tuberculosis	0
Shifang	11	male	pulmonary tuberculosis	0
Shifang	12	male	pulmonary tuberculosis	4
Shifang	13	male	pulmonary tuberculosis	15
Shifang	14	male	pulmonary tuberculosis	15
Shifang	15	male	pulmonary tuberculosis	27
Shifang	16	male	pulmonary tuberculosis	40
Shifang	17	male	pulmonary tuberculosis	57
Shifang	18	male	pulmonary tuberculosis	36
Shifang	19	male	pulmonary tuberculosis	16
Yuexi	1	male	pulmonary tuberculosis	0
Yuexi	2	male	pulmonary tuberculosis	0
Yuexi	3	male	pulmonary tuberculosis	0
Yuexi	4	male	pulmonary tuberculosis	0
Yuexi	5	male	pulmonary tuberculosis	0
Yuexi	6	male	pulmonary tuberculosis	0
Yuexi	7	male	pulmonary tuberculosis	0
Yuexi	8	male	pulmonary tuberculosis	0
Yuexi	9	male	pulmonary tuberculosis	0
Yuexi	10	male	pulmonary tuberculosis	0
Yuexi	11	male	pulmonary tuberculosis	2
Yuexi	12	male	pulmonary tuberculosis	23
Yuexi	13	male	pulmonary tuberculosis	31
Yuexi	14	male	pulmonary tuberculosis	51
Yuexi	15	male	pulmonary tuberculosis	36
Yuexi	16	male	pulmonary tuberculosis	22
Yuexi	17	male	pulmonary tuberculosis	16
Yuexi	18	male	pulmonary tuberculosis	8
Yuexi	19	male	pulmonary tuberculosis	1
Lu	1	female	pulmonary tuberculosis	0
Lu	2	female	pulmonary tuberculosis	0
Lu	3	female	pulmonary tuberculosis	0
Lu	4	female	pulmonary tuberculosis	0
Lu	5	female	pulmonary tuberculosis	0
Lu	6	female	pulmonary tuberculosis	1
Lu	7	female	pulmonary tuberculosis	0
Lu	8	female	pulmonary tuberculosis	0
Lu	9	female	pulmonary tuberculosis	0
Lu	10	female	pulmonary tuberculosis	1
Lu	11	female	pulmonary tuberculosis	0
Lu	12	female	pulmonary tuberculosis	6
Lu	13	female	pulmonary tuberculosis	10
Lu	14	female	pulmonary tuberculosis	22
Lu	15	female	pulmonary tuberculosis	29
Lu	16	female	pulmonary tuberculosis	29
Lu	17	female	pulmonary tuberculosis	12
Lu	18	female	pulmonary tuberculosis	14
Lu	19	female	pulmonary tuberculosis	11
Shifang	1	female	pulmonary tuberculosis	0
Shifang	2	female	pulmonary tuberculosis	0
Shifang	3	female	pulmonary tuberculosis	0
Shifang	4	female	pulmonary tuberculosis	0
Shifang	5	female	pulmonary tuberculosis	0
Shifang	6	female	pulmonary tuberculosis	0
Shifang	7	female	pulmonary tuberculosis	0
Shifang	8	female	pulmonary tuberculosis	0
Shifang	9	female	pulmonary tuberculosis	0
Shifang	10	female	pulmonary tuberculosis	0
Shifang	11	female	pulmonary tuberculosis	0
Shifang	12	female	pulmonary tuberculosis	1
Shifang	13	female	pulmonary tuberculosis	7
Shifang	14	female	pulmonary tuberculosis	20
Shifang	15	female	pulmonary tuberculosis	16
Shifang	16	female	pulmonary tuberculosis	18
Shifang	17	female	pulmonary tuberculosis	14
Shifang	18	female	pulmonary tuberculosis	12
Shifang	19	female	pulmonary tuberculosis	6
Yuexi	1	female	pulmonary tuberculosis	1
Yuexi	2	female	pulmonary tuberculosis	0
Yuexi	3	female	pulmonary tuberculosis	0
Yuexi	4	female	pulmonary tuberculosis	0
Yuexi	5	female	pulmonary tuberculosis	0
Yuexi	6	female	pulmonary tuberculosis	0
Yuexi	7	female	pulmonary tuberculosis	1
Yuexi	8	female	pulmonary tuberculosis	0
Yuexi	9	female	pulmonary tuberculosis	0
Yuexi	10	female	pulmonary tuberculosis	0
Yuexi	11	female	pulmonary tuberculosis	0
Yuexi	12	female	pulmonary tuberculosis	17
Yuexi	13	female	pulmonary tuberculosis	15
Yuexi	14	female	pulmonary tuberculosis	18
Yuexi	15	female	pulmonary tuberculosis	10
Yuexi	16	female	pulmonary tuberculosis	8
Yuexi	17	female	pulmonary tuberculosis	5
Yuexi	18	female	pulmonary tuberculosis	2
Yuexi	19	female	pulmonary tuberculosis	1
Lu	1	male	mumps	0
Lu	2	male	mumps	2
Lu	3	male	mumps	1
Lu	4	male	mumps	5
Lu	5	male	mumps	4
Lu	6	male	mumps	10
Lu	7	male	mumps	7
Lu	8	male	mumps	8
Lu	9	male	mumps	9
Lu	10	male	mumps	7
Lu	11	male	mumps	13
Lu	12	male	mumps	1
Lu	13	male	mumps	0
Lu	14	male	mumps	0
Lu	15	male	mumps	0
Lu	16	male	mumps	0
Lu	17	male	mumps	0
Lu	18	male	mumps	0
Lu	19	male	mumps	0
Shifang	1	male	mumps	0
Shifang	2	male	mumps	1
Shifang	3	male	mumps	3
Shifang	4	male	mumps	2
Shifang	5	male	mumps	10
Shifang	6	male	mumps	3
Shifang	7	male	mumps	7
Shifang	8	male	mumps	1
Shifang	9	male	mumps	3
Shifang	10	male	mumps	1
Shifang	11	male	mumps	5
Shifang	12	male	mumps	0
Shifang	13	male	mumps	0
Shifang	14	male	mumps	0
Shifang	15	male	mumps	0
Shifang	16	male	mumps	1
Shifang	17	male	mumps	0
Shifang	18	male	mumps	0
Shifang	19	male	mumps	0
Yuexi	1	male	mumps	0
Yuexi	2	male	mumps	0
Yuexi	3	male	mumps	0
Yuexi	4	male	mumps	0
Yuexi	5	male	mumps	0
Yuexi	6	male	mumps	0
Yuexi	7	male	mumps	1
Yuexi	8	male	mumps	1
Yuexi	9	male	mumps	0
Yuexi	10	male	mumps	0
Yuexi	11	male	mumps	0
Yuexi	12	male	mumps	0
Yuexi	13	male	mumps	0
Yuexi	14	male	mumps	1
Yuexi	15	male	mumps	0
Yuexi	16	male	mumps	0
Yuexi	17	male	mumps	0
Yuexi	18	male	mumps	0
Yuexi	19	male	mumps	0
Lu	1	female	mumps	0
Lu	2	female	mumps	1
Lu	3	female	mumps	2
Lu	4	female	mumps	1
Lu	5	female	mumps	4
Lu	6	female	mumps	4
Lu	7	female	mumps	5
Lu	8	female	mumps	4
Lu	9	female	mumps	2
Lu	10	female	mumps	4
Lu	11	female	mumps	5
Lu	12	female	mumps	0
Lu	13	female	mumps	0
Lu	14	female	mumps	0
Lu	15	female	mumps	0
Lu	16	female	mumps	0
Lu	17	female	mumps	0
Lu	18	female	mumps	0
Lu	19	female	mumps	0
Shifang	1	female	mumps	0
Shifang	2	female	mumps	0
Shifang	3	female	mumps	2
Shifang	4	female	mumps	1
Shifang	5	female	mumps	2
Shifang	6	female	mumps	4
Shifang	7	female	mumps	2
Shifang	8	female	mumps	2
Shifang	9	female	mumps	0
Shifang	10	female	mumps	1
Shifang	11	female	mumps	1
Shifang	12	female	mumps	1
Shifang	13	female	mumps	0
Shifang	14	female	mumps	1
Shifang	15	female	mumps	3
Shifang	16	female	mumps	0
Shifang	17	female	mumps	2
Shifang	18	female	mumps	1
Shifang	19	female	mumps	0
Yuexi	1	female	mumps	0
Yuexi	2	female	mumps	0
Yuexi	3	female	mumps	0
Yuexi	4	female	mumps	0
Yuexi	5	female	mumps	0
Yuexi	6	female	mumps	0
Yuexi	7	female	mumps	0
Yuexi	8	female	mumps	0
Yuexi	9	female	mumps	0
Yuexi	10	female	mumps	1
Yuexi	11	female	mumps	0
Yuexi	12	female	mumps	0
Yuexi	13	female	mumps	0
Yuexi	14	female	mumps	0
Yuexi	15	female	mumps	1
Yuexi	16	female	mumps	0
Yuexi	17	female	mumps	0
Yuexi	18	female	mumps	0
Yuexi	19	female	mumps	0
Lu	1	male	varicella	0
Lu	2	male	varicella	0
Lu	3	male	varicella	0
Lu	4	male	varicella	0
Lu	5	male	varicella	0
Lu	6	male	varicella	0
Lu	7	male	varicella	0
Lu	8	male	varicella	0
Lu	9	male	varicella	0
Lu	10	male	varicella	0
Lu	11	male	varicella	0
Lu	12	male	varicella	0
Lu	13	male	varicella	0
Lu	14	male	varicella	0
Lu	15	male	varicella	0
Lu	16	male	varicella	0
Lu	17	male	varicella	0
Lu	18	male	varicella	0
Lu	19	male	varicella	0
Shifang	1	male	varicella	6
Shifang	2	male	varicella	6
Shifang	3	male	varicella	10
Shifang	4	male	varicella	8
Shifang	5	male	varicella	6
Shifang	6	male	varicella	3
Shifang	7	male	varicella	5
Shifang	8	male	varicella	4
Shifang	9	male	varicella	2
Shifang	10	male	varicella	4
Shifang	11	male	varicella	12
Shifang	12	male	varicella	5
Shifang	13	male	varicella	3
Shifang	14	male	varicella	7
Shifang	15	male	varicella	0
Shifang	16	male	varicella	0
Shifang	17	male	varicella	0
Shifang	18	male	varicella	0
Shifang	19	male	varicella	0
Yuexi	1	male	varicella	3
Yuexi	2	male	varicella	0
Yuexi	3	male	varicella	0
Yuexi	4	male	varicella	0
Yuexi	5	male	varicella	0
Yuexi	6	male	varicella	2
Yuexi	7	male	varicella	1
Yuexi	8	male	varicella	1
Yuexi	9	male	varicella	1
Yuexi	10	male	varicella	1
Yuexi	11	male	varicella	2
Yuexi	12	male	varicella	1
Yuexi	13	male	varicella	0
Yuexi	14	male	varicella	0
Yuexi	15	male	varicella	0
Yuexi	16	male	varicella	0
Yuexi	17	male	varicella	0
Yuexi	18	male	varicella	0
Yuexi	19	male	varicella	0
Lu	1	female	varicella	0
Lu	2	female	varicella	0
Lu	3	female	varicella	0
Lu	4	female	varicella	0
Lu	5	female	varicella	0
Lu	6	female	varicella	0
Lu	7	female	varicella	0
Lu	8	female	varicella	0
Lu	9	female	varicella	0
Lu	10	female	varicella	0
Lu	11	female	varicella	0
Lu	12	female	varicella	0
Lu	13	female	varicella	0
Lu	14	female	varicella	0
Lu	15	female	varicella	0
Lu	16	female	varicella	0
Lu	17	female	varicella	0
Lu	18	female	varicella	0
Lu	19	female	varicella	0
Shifang	1	female	varicella	5
Shifang	2	female	varicella	6
Shifang	3	female	varicella	2
Shifang	4	female	varicella	8
Shifang	5	female	varicella	4
Shifang	6	female	varicella	7
Shifang	7	female	varicella	5
Shifang	8	female	varicella	6
Shifang	9	female	varicella	1
Shifang	10	female	varicella	5
Shifang	11	female	varicella	2
Shifang	12	female	varicella	4
Shifang	13	female	varicella	1
Shifang	14	female	varicella	6
Shifang	15	female	varicella	1
Shifang	16	female	varicella	0
Shifang	17	female	varicella	0
Shifang	18	female	varicella	0
Shifang	19	female	varicella	0
Yuexi	1	female	varicella	0
Yuexi	2	female	varicella	0
Yuexi	3	female	varicella	0
Yuexi	4	female	varicella	0
Yuexi	5	female	varicella	1
Yuexi	6	female	varicella	0
Yuexi	7	female	varicella	1
Yuexi	8	female	varicella	0
Yuexi	9	female	varicella	0
Yuexi	10	female	varicella	0
Yuexi	11	female	varicella	1
Yuexi	12	female	varicella	2
Yuexi	13	female	varicella	0
Yuexi	14	female	varicella	0
Yuexi	15	female	varicella	0
Yuexi	16	female	varicella	0
Yuexi	17	female	varicella	0
Yuexi	18	female	varicella	0
Yuexi	19	female	varicella	0

## Sheet: 2014 IIDs
DQ	age	gender	disease	number
Lu	1	male	bacillary dysentery	4
Lu	2	male	bacillary dysentery	2
Lu	3	male	bacillary dysentery	0
Lu	4	male	bacillary dysentery	0
Lu	5	male	bacillary dysentery	1
Lu	6	male	bacillary dysentery	0
Lu	7	male	bacillary dysentery	0
Lu	8	male	bacillary dysentery	0
Lu	9	male	bacillary dysentery	0
Lu	10	male	bacillary dysentery	0
Lu	11	male	bacillary dysentery	0
Lu	12	male	bacillary dysentery	0
Lu	13	male	bacillary dysentery	2
Lu	14	male	bacillary dysentery	1
Lu	15	male	bacillary dysentery	1
Lu	16	male	bacillary dysentery	0
Lu	17	male	bacillary dysentery	0
Lu	18	male	bacillary dysentery	0
Lu	19	male	bacillary dysentery	0
Shifang	1	male	bacillary dysentery	0
Shifang	2	male	bacillary dysentery	0
Shifang	3	male	bacillary dysentery	1
Shifang	4	male	bacillary dysentery	0
Shifang	5	male	bacillary dysentery	0
Shifang	6	male	bacillary dysentery	0
Shifang	7	male	bacillary dysentery	0
Shifang	8	male	bacillary dysentery	0
Shifang	9	male	bacillary dysentery	0
Shifang	10	male	bacillary dysentery	0
Shifang	11	male	bacillary dysentery	0
Shifang	12	male	bacillary dysentery	0
Shifang	13	male	bacillary dysentery	0
Shifang	14	male	bacillary dysentery	0
Shifang	15	male	bacillary dysentery	0
Shifang	16	male	bacillary dysentery	0
Shifang	17	male	bacillary dysentery	0
Shifang	18	male	bacillary dysentery	0
Shifang	19	male	bacillary dysentery	0
Yuexi	1	male	bacillary dysentery	2
Yuexi	2	male	bacillary dysentery	8
Yuexi	3	male	bacillary dysentery	5
Yuexi	4	male	bacillary dysentery	2
Yuexi	5	male	bacillary dysentery	1
Yuexi	6	male	bacillary dysentery	2
Yuexi	7	male	bacillary dysentery	2
Yuexi	8	male	bacillary dysentery	0
Yuexi	9	male	bacillary dysentery	0
Yuexi	10	male	bacillary dysentery	0
Yuexi	11	male	bacillary dysentery	0
Yuexi	12	male	bacillary dysentery	0
Yuexi	13	male	bacillary dysentery	1
Yuexi	14	male	bacillary dysentery	5
Yuexi	15	male	bacillary dysentery	2
Yuexi	16	male	bacillary dysentery	7
Yuexi	17	male	bacillary dysentery	5
Yuexi	18	male	bacillary dysentery	1
Yuexi	19	male	bacillary dysentery	0
Lu	1	female	bacillary dysentery	1
Lu	2	female	bacillary dysentery	1
Lu	3	female	bacillary dysentery	0
Lu	4	female	bacillary dysentery	0
Lu	5	female	bacillary dysentery	0
Lu	6	female	bacillary dysentery	0
Lu	7	female	bacillary dysentery	0
Lu	8	female	bacillary dysentery	0
Lu	9	female	bacillary dysentery	0
Lu	10	female	bacillary dysentery	0
Lu	11	female	bacillary dysentery	0
Lu	12	female	bacillary dysentery	0
Lu	13	female	bacillary dysentery	0
Lu	14	female	bacillary dysentery	0
Lu	15	female	bacillary dysentery	1
Lu	16	female	bacillary dysentery	0
Lu	17	female	bacillary dysentery	0
Lu	18	female	bacillary dysentery	0
Lu	19	female	bacillary dysentery	1
Shifang	1	female	bacillary dysentery	0
Shifang	2	female	bacillary dysentery	0
Shifang	3	female	bacillary dysentery	0
Shifang	4	female	bacillary dysentery	0
Shifang	5	female	bacillary dysentery	0
Shifang	6	female	bacillary dysentery	0
Shifang	7	female	bacillary dysentery	0
Shifang	8	female	bacillary dysentery	0
Shifang	9	female	bacillary dysentery	0
Shifang	10	female	bacillary dysentery	0
Shifang	11	female	bacillary dysentery	0
Shifang	12	female	bacillary dysentery	1
Shifang	13	female	bacillary dysentery	0
Shifang	14	female	bacillary dysentery	0
Shifang	15	female	bacillary dysentery	0
Shifang	16	female	bacillary dysentery	1
Shifang	17	female	bacillary dysentery	0
Shifang	18	female	bacillary dysentery	0
Shifang	19	female	bacillary dysentery	0
Yuexi	1	female	bacillary dysentery	3
Yuexi	2	female	bacillary dysentery	7
Yuexi	3	female	bacillary dysentery	2
Yuexi	4	female	bacillary dysentery	1
Yuexi	5	female	bacillary dysentery	3
Yuexi	6	female	bacillary dysentery	0
Yuexi	7	female	bacillary dysentery	1
Yuexi	8	female	bacillary dysentery	0
Yuexi	9	female	bacillary dysentery	0
Yuexi	10	female	bacillary dysentery	0
Yuexi	11	female	bacillary dysentery	5
Yuexi	12	female	bacillary dysentery	0
Yuexi	13	female	bacillary dysentery	4
Yuexi	14	female	bacillary dysentery	12
Yuexi	15	female	bacillary dysentery	8
Yuexi	16	female	bacillary dysentery	5
Yuexi	17	female	bacillary dysentery	9
Yuexi	18	female	bacillary dysentery	4
Yuexi	19	female	bacillary dysentery	0
Lu	1	male	other infectious diarrhea	36
Lu	2	male	other infectious diarrhea	21
Lu	3	male	other infectious diarrhea	4
Lu	4	male	other infectious diarrhea	2
Lu	5	male	other infectious diarrhea	0
Lu	6	male	other infectious diarrhea	1
Lu	7	male	other infectious diarrhea	3
Lu	8	male	other infectious diarrhea	1
Lu	9	male	other infectious diarrhea	2
Lu	10	male	other infectious diarrhea	2
Lu	11	male	other infectious diarrhea	3
Lu	12	male	other infectious diarrhea	2
Lu	13	male	other infectious diarrhea	0
Lu	14	male	other infectious diarrhea	2
Lu	15	male	other infectious diarrhea	3
Lu	16	male	other infectious diarrhea	4
Lu	17	male	other infectious diarrhea	5
Lu	18	male	other infectious diarrhea	5
Lu	19	male	other infectious diarrhea	4
Shifang	1	male	other infectious diarrhea	23
Shifang	2	male	other infectious diarrhea	24
Shifang	3	male	other infectious diarrhea	2
Shifang	4	male	other infectious diarrhea	2
Shifang	5	male	other infectious diarrhea	1
Shifang	6	male	other infectious diarrhea	0
Shifang	7	male	other infectious diarrhea	0
Shifang	8	male	other infectious diarrhea	0
Shifang	9	male	other infectious diarrhea	0
Shifang	10	male	other infectious diarrhea	0
Shifang	11	male	other infectious diarrhea	1
Shifang	12	male	other infectious diarrhea	0
Shifang	13	male	other infectious diarrhea	0
Shifang	14	male	other infectious diarrhea	1
Shifang	15	male	other infectious diarrhea	2
Shifang	16	male	other infectious diarrhea	4
Shifang	17	male	other infectious diarrhea	0
Shifang	18	male	other infectious diarrhea	2
Shifang	19	male	other infectious diarrhea	0
Yuexi	1	male	other infectious diarrhea	6
Yuexi	2	male	other infectious diarrhea	2
Yuexi	3	male	other infectious diarrhea	1
Yuexi	4	male	other infectious diarrhea	2
Yuexi	5	male	other infectious diarrhea	0
Yuexi	6	male	other infectious diarrhea	0
Yuexi	7	male	other infectious diarrhea	0
Yuexi	8	male	other infectious diarrhea	0
Yuexi	9	male	other infectious diarrhea	1
Yuexi	10	male	other infectious diarrhea	0
Yuexi	11	male	other infectious diarrhea	1
Yuexi	12	male	other infectious diarrhea	0
Yuexi	13	male	other infectious diarrhea	0
Yuexi	14	male	other infectious diarrhea	1
Yuexi	15	male	other infectious diarrhea	1
Yuexi	16	male	other infectious diarrhea	0
Yuexi	17	male	other infectious diarrhea	0
Yuexi	18	male	other infectious diarrhea	4
Yuexi	19	male	other infectious diarrhea	1
Lu	1	female	other infectious diarrhea	25
Lu	2	female	other infectious diarrhea	8
Lu	3	female	other infectious diarrhea	7
Lu	4	female	other infectious diarrhea	1
Lu	5	female	other infectious diarrhea	3
Lu	6	female	other infectious diarrhea	0
Lu	7	female	other infectious diarrhea	1
Lu	8	female	other infectious diarrhea	0
Lu	9	female	other infectious diarrhea	0
Lu	10	female	other infectious diarrhea	0
Lu	11	female	other infectious diarrhea	4
Lu	12	female	other infectious diarrhea	5
Lu	13	female	other infectious diarrhea	2
Lu	14	female	other infectious diarrhea	3
Lu	15	female	other infectious diarrhea	6
Lu	16	female	other infectious diarrhea	11
Lu	17	female	other infectious diarrhea	10
Lu	18	female	other infectious diarrhea	2
Lu	19	female	other infectious diarrhea	6
Shifang	1	female	other infectious diarrhea	22
Shifang	2	female	other infectious diarrhea	21
Shifang	3	female	other infectious diarrhea	10
Shifang	4	female	other infectious diarrhea	1
Shifang	5	female	other infectious diarrhea	0
Shifang	6	female	other infectious diarrhea	0
Shifang	7	female	other infectious diarrhea	0
Shifang	8	female	other infectious diarrhea	1
Shifang	9	female	other infectious diarrhea	0
Shifang	10	female	other infectious diarrhea	0
Shifang	11	female	other infectious diarrhea	0
Shifang	12	female	other infectious diarrhea	0
Shifang	13	female	other infectious diarrhea	0
Shifang	14	female	other infectious diarrhea	0
Shifang	15	female	other infectious diarrhea	2
Shifang	16	female	other infectious diarrhea	1
Shifang	17	female	other infectious diarrhea	0
Shifang	18	female	other infectious diarrhea	1
Shifang	19	female	other infectious diarrhea	0
Yuexi	1	female	other infectious diarrhea	3
Yuexi	2	female	other infectious diarrhea	4
Yuexi	3	female	other infectious diarrhea	1
Yuexi	4	female	other infectious diarrhea	1
Yuexi	5	female	other infectious diarrhea	0
Yuexi	6	female	other infectious diarrhea	1
Yuexi	7	female	other infectious diarrhea	0
Yuexi	8	female	other infectious diarrhea	0
Yuexi	9	female	other infectious diarrhea	0
Yuexi	10	female	other infectious diarrhea	1
Yuexi	11	female	other infectious diarrhea	0
Yuexi	12	female	other infectious diarrhea	0
Yuexi	13	female	other infectious diarrhea	0
Yuexi	14	female	other infectious diarrhea	2
Yuexi	15	female	other infectious diarrhea	0
Yuexi	16	female	other infectious diarrhea	2
Yuexi	17	female	other infectious diarrhea	0
Yuexi	18	female	other infectious diarrhea	1
Yuexi	19	female	other infectious diarrhea	0
Lu	1	male	HFMD	18
Lu	2	male	HFMD	96
Lu	3	male	HFMD	65
Lu	4	male	HFMD	47
Lu	5	male	HFMD	20
Lu	6	male	HFMD	12
Lu	7	male	HFMD	5
Lu	8	male	HFMD	2
Lu	9	male	HFMD	0
Lu	10	male	HFMD	2
Lu	11	male	HFMD	0
Lu	12	male	HFMD	0
Lu	13	male	HFMD	0
Lu	14	male	HFMD	1
Lu	15	male	HFMD	0
Lu	16	male	HFMD	0
Lu	17	male	HFMD	0
Lu	18	male	HFMD	0
Lu	19	male	HFMD	0
Shifang	1	male	HFMD	31
Shifang	2	male	HFMD	223
Shifang	3	male	HFMD	259
Shifang	4	male	HFMD	154
Shifang	5	male	HFMD	61
Shifang	6	male	HFMD	19
Shifang	7	male	HFMD	7
Shifang	8	male	HFMD	2
Shifang	9	male	HFMD	0
Shifang	10	male	HFMD	0
Shifang	11	male	HFMD	1
Shifang	12	male	HFMD	0
Shifang	13	male	HFMD	0
Shifang	14	male	HFMD	3
Shifang	15	male	HFMD	0
Shifang	16	male	HFMD	0
Shifang	17	male	HFMD	0
Shifang	18	male	HFMD	0
Shifang	19	male	HFMD	0
Yuexi	1	male	HFMD	1
Yuexi	2	male	HFMD	23
Yuexi	3	male	HFMD	16
Yuexi	4	male	HFMD	8
Yuexi	5	male	HFMD	3
Yuexi	6	male	HFMD	1
Yuexi	7	male	HFMD	0
Yuexi	8	male	HFMD	0
Yuexi	9	male	HFMD	1
Yuexi	10	male	HFMD	0
Yuexi	11	male	HFMD	0
Yuexi	12	male	HFMD	0
Yuexi	13	male	HFMD	0
Yuexi	14	male	HFMD	0
Yuexi	15	male	HFMD	0
Yuexi	16	male	HFMD	0
Yuexi	17	male	HFMD	0
Yuexi	18	male	HFMD	0
Yuexi	19	male	HFMD	0
Lu	1	female	HFMD	6
Lu	2	female	HFMD	62
Lu	3	female	HFMD	58
Lu	4	female	HFMD	20
Lu	5	female	HFMD	13
Lu	6	female	HFMD	1
Lu	7	female	HFMD	3
Lu	8	female	HFMD	5
Lu	9	female	HFMD	2
Lu	10	female	HFMD	1
Lu	11	female	HFMD	0
Lu	12	female	HFMD	0
Lu	13	female	HFMD	0
Lu	14	female	HFMD	0
Lu	15	female	HFMD	0
Lu	16	female	HFMD	0
Lu	17	female	HFMD	0
Lu	18	female	HFMD	0
Lu	19	female	HFMD	0
Shifang	1	female	HFMD	26
Shifang	2	female	HFMD	173
Shifang	3	female	HFMD	187
Shifang	4	female	HFMD	116
Shifang	5	female	HFMD	49
Shifang	6	female	HFMD	13
Shifang	7	female	HFMD	5
Shifang	8	female	HFMD	0
Shifang	9	female	HFMD	1
Shifang	10	female	HFMD	0
Shifang	11	female	HFMD	1
Shifang	12	female	HFMD	0
Shifang	13	female	HFMD	0
Shifang	14	female	HFMD	2
Shifang	15	female	HFMD	0
Shifang	16	female	HFMD	0
Shifang	17	female	HFMD	0
Shifang	18	female	HFMD	0
Shifang	19	female	HFMD	0
Yuexi	1	female	HFMD	3
Yuexi	2	female	HFMD	13
Yuexi	3	female	HFMD	9
Yuexi	4	female	HFMD	6
Yuexi	5	female	HFMD	1
Yuexi	6	female	HFMD	0
Yuexi	7	female	HFMD	0
Yuexi	8	female	HFMD	0
Yuexi	9	female	HFMD	0
Yuexi	10	female	HFMD	0
Yuexi	11	female	HFMD	0
Yuexi	12	female	HFMD	0
Yuexi	13	female	HFMD	0
Yuexi	14	female	HFMD	0
Yuexi	15	female	HFMD	0
Yuexi	16	female	HFMD	0
Yuexi	17	female	HFMD	0
Yuexi	18	female	HFMD	0
Yuexi	19	female	HFMD	0

## Sheet: 2015 RIDs
DQ	age	gender	disease	number
Lu	1	male	pulmonary tuberculosis	0
Lu	2	male	pulmonary tuberculosis	0
Lu	3	male	pulmonary tuberculosis	0
Lu	4	male	pulmonary tuberculosis	0
Lu	5	male	pulmonary tuberculosis	0
Lu	6	male	pulmonary tuberculosis	0
Lu	7	male	pulmonary tuberculosis	0
Lu	8	male	pulmonary tuberculosis	0
Lu	9	male	pulmonary tuberculosis	0
Lu	10	male	pulmonary tuberculosis	0
Lu	11	male	pulmonary tuberculosis	0
Lu	12	male	pulmonary tuberculosis	7
Lu	13	male	pulmonary tuberculosis	13
Lu	14	male	pulmonary tuberculosis	23
Lu	15	male	pulmonary tuberculosis	54
Lu	16	male	pulmonary tuberculosis	93
Lu	17	male	pulmonary tuberculosis	117
Lu	18	male	pulmonary tuberculosis	63
Lu	19	male	pulmonary tuberculosis	29
Shifang	1	male	pulmonary tuberculosis	0
Shifang	2	male	pulmonary tuberculosis	0
Shifang	3	male	pulmonary tuberculosis	0
Shifang	4	male	pulmonary tuberculosis	0
Shifang	5	male	pulmonary tuberculosis	0
Shifang	6	male	pulmonary tuberculosis	0
Shifang	7	male	pulmonary tuberculosis	0
Shifang	8	male	pulmonary tuberculosis	0
Shifang	9	male	pulmonary tuberculosis	0
Shifang	10	male	pulmonary tuberculosis	0
Shifang	11	male	pulmonary tuberculosis	0
Shifang	12	male	pulmonary tuberculosis	8
Shifang	13	male	pulmonary tuberculosis	10
Shifang	14	male	pulmonary tuberculosis	22
Shifang	15	male	pulmonary tuberculosis	23
Shifang	16	male	pulmonary tuberculosis	55
Shifang	17	male	pulmonary tuberculosis	51
Shifang	18	male	pulmonary tuberculosis	24
Shifang	19	male	pulmonary tuberculosis	14
Yuexi	1	male	pulmonary tuberculosis	0
Yuexi	2	male	pulmonary tuberculosis	4
Yuexi	3	male	pulmonary tuberculosis	0
Yuexi	4	male	pulmonary tuberculosis	0
Yuexi	5	male	pulmonary tuberculosis	2
Yuexi	6	male	pulmonary tuberculosis	2
Yuexi	7	male	pulmonary tuberculosis	2
Yuexi	8	male	pulmonary tuberculosis	2
Yuexi	9	male	pulmonary tuberculosis	0
Yuexi	10	male	pulmonary tuberculosis	0
Yuexi	11	male	pulmonary tuberculosis	8
Yuexi	12	male	pulmonary tuberculosis	45
Yuexi	13	male	pulmonary tuberculosis	52
Yuexi	14	male	pulmonary tuberculosis	90
Yuexi	15	male	pulmonary tuberculosis	59
Yuexi	16	male	pulmonary tuberculosis	32
Yuexi	17	male	pulmonary tuberculosis	22
Yuexi	18	male	pulmonary tuberculosis	33
Yuexi	19	male	pulmonary tuberculosis	7
Lu	1	female	pulmonary tuberculosis	0
Lu	2	female	pulmonary tuberculosis	0
Lu	3	female	pulmonary tuberculosis	0
Lu	4	female	pulmonary tuberculosis	0
Lu	5	female	pulmonary tuberculosis	0
Lu	6	female	pulmonary tuberculosis	0
Lu	7	female	pulmonary tuberculosis	0
Lu	8	female	pulmonary tuberculosis	0
Lu	9	female	pulmonary tuberculosis	0
Lu	10	female	pulmonary tuberculosis	0
Lu	11	female	pulmonary tuberculosis	2
Lu	12	female	pulmonary tuberculosis	10
Lu	13	female	pulmonary tuberculosis	10
Lu	14	female	pulmonary tuberculosis	13
Lu	15	female	pulmonary tuberculosis	28
Lu	16	female	pulmonary tuberculosis	22
Lu	17	female	pulmonary tuberculosis	20
Lu	18	female	pulmonary tuberculosis	15
Lu	19	female	pulmonary tuberculosis	12
Shifang	1	female	pulmonary tuberculosis	0
Shifang	2	female	pulmonary tuberculosis	0
Shifang	3	female	pulmonary tuberculosis	0
Shifang	4	female	pulmonary tuberculosis	0
Shifang	5	female	pulmonary tuberculosis	0
Shifang	6	female	pulmonary tuberculosis	0
Shifang	7	female	pulmonary tuberculosis	0
Shifang	8	female	pulmonary tuberculosis	0
Shifang	9	female	pulmonary tuberculosis	0
Shifang	10	female	pulmonary tuberculosis	0
Shifang	11	female	pulmonary tuberculosis	0
Shifang	12	female	pulmonary tuberculosis	7
Shifang	13	female	pulmonary tuberculosis	12
Shifang	14	female	pulmonary tuberculosis	13
Shifang	15	female	pulmonary tuberculosis	16
Shifang	16	female	pulmonary tuberculosis	19
Shifang	17	female	pulmonary tuberculosis	22
Shifang	18	female	pulmonary tuberculosis	4
Shifang	19	female	pulmonary tuberculosis	9
Yuexi	1	female	pulmonary tuberculosis	1
Yuexi	2	female	pulmonary tuberculosis	0
Yuexi	3	female	pulmonary tuberculosis	2
Yuexi	4	female	pulmonary tuberculosis	0
Yuexi	5	female	pulmonary tuberculosis	1
Yuexi	6	female	pulmonary tuberculosis	0
Yuexi	7	female	pulmonary tuberculosis	0
Yuexi	8	female	pulmonary tuberculosis	0
Yuexi	9	female	pulmonary tuberculosis	1
Yuexi	10	female	pulmonary tuberculosis	0
Yuexi	11	female	pulmonary tuberculosis	4
Yuexi	12	female	pulmonary tuberculosis	42
Yuexi	13	female	pulmonary tuberculosis	28
Yuexi	14	female	pulmonary tuberculosis	50
Yuexi	15	female	pulmonary tuberculosis	32
Yuexi	16	female	pulmonary tuberculosis	14
Yuexi	17	female	pulmonary tuberculosis	16
Yuexi	18	female	pulmonary tuberculosis	13
Yuexi	19	female	pulmonary tuberculosis	2
Lu	1	male	mumps	0
Lu	2	male	mumps	0
Lu	3	male	mumps	2
Lu	4	male	mumps	1
Lu	5	male	mumps	3
Lu	6	male	mumps	6
Lu	7	male	mumps	3
Lu	8	male	mumps	2
Lu	9	male	mumps	6
Lu	10	male	mumps	7
Lu	11	male	mumps	5
Lu	12	male	mumps	0
Lu	13	male	mumps	0
Lu	14	male	mumps	0
Lu	15	male	mumps	0
Lu	16	male	mumps	0
Lu	17	male	mumps	0
Lu	18	male	mumps	0
Lu	19	male	mumps	0
Shifang	1	male	mumps	0
Shifang	2	male	mumps	3
Shifang	3	male	mumps	1
Shifang	4	male	mumps	5
Shifang	5	male	mumps	1
Shifang	6	male	mumps	8
Shifang	7	male	mumps	1
Shifang	8	male	mumps	2
Shifang	9	male	mumps	1
Shifang	10	male	mumps	0
Shifang	11	male	mumps	5
Shifang	12	male	mumps	0
Shifang	13	male	mumps	0
Shifang	14	male	mumps	1
Shifang	15	male	mumps	0
Shifang	16	male	mumps	1
Shifang	17	male	mumps	0
Shifang	18	male	mumps	0
Shifang	19	male	mumps	0
Yuexi	1	male	mumps	0
Yuexi	2	male	mumps	0
Yuexi	3	male	mumps	0
Yuexi	4	male	mumps	0
Yuexi	5	male	mumps	2
Yuexi	6	male	mumps	1
Yuexi	7	male	mumps	1
Yuexi	8	male	mumps	4
Yuexi	9	male	mumps	0
Yuexi	10	male	mumps	0
Yuexi	11	male	mumps	0
Yuexi	12	male	mumps	0
Yuexi	13	male	mumps	0
Yuexi	14	male	mumps	0
Yuexi	15	male	mumps	0
Yuexi	16	male	mumps	0
Yuexi	17	male	mumps	0
Yuexi	18	male	mumps	0
Yuexi	19	male	mumps	0
Lu	1	female	mumps	0
Lu	2	female	mumps	0
Lu	3	female	mumps	2
Lu	4	female	mumps	7
Lu	5	female	mumps	2
Lu	6	female	mumps	2
Lu	7	female	mumps	4
Lu	8	female	mumps	1
Lu	9	female	mumps	4
Lu	10	female	mumps	0
Lu	11	female	mumps	4
Lu	12	female	mumps	2
Lu	13	female	mumps	0
Lu	14	female	mumps	0
Lu	15	female	mumps	2
Lu	16	female	mumps	0
Lu	17	female	mumps	0
Lu	18	female	mumps	0
Lu	19	female	mumps	0
Shifang	1	female	mumps	0
Shifang	2	female	mumps	0
Shifang	3	female	mumps	2
Shifang	4	female	mumps	4
Shifang	5	female	mumps	3
Shifang	6	female	mumps	0
Shifang	7	female	mumps	2
Shifang	8	female	mumps	1
Shifang	9	female	mumps	4
Shifang	10	female	mumps	0
Shifang	11	female	mumps	2
Shifang	12	female	mumps	0
Shifang	13	female	mumps	0
Shifang	14	female	mumps	1
Shifang	15	female	mumps	2
Shifang	16	female	mumps	0
Shifang	17	female	mumps	1
Shifang	18	female	mumps	0
Shifang	19	female	mumps	0
Yuexi	1	female	mumps	0
Yuexi	2	female	mumps	0
Yuexi	3	female	mumps	0
Yuexi	4	female	mumps	0
Yuexi	5	female	mumps	0
Yuexi	6	female	mumps	0
Yuexi	7	female	mumps	2
Yuexi	8	female	mumps	0
Yuexi	9	female	mumps	0
Yuexi	10	female	mumps	0
Yuexi	11	female	mumps	0
Yuexi	12	female	mumps	1
Yuexi	13	female	mumps	1
Yuexi	14	female	mumps	0
Yuexi	15	female	mumps	0
Yuexi	16	female	mumps	0
Yuexi	17	female	mumps	0
Yuexi	18	female	mumps	0
Yuexi	19	female	mumps	0
Lu	1	male	varicella	9
Lu	2	male	varicella	9
Lu	3	male	varicella	2
Lu	4	male	varicella	9
Lu	5	male	varicella	9
Lu	6	male	varicella	7
Lu	7	male	varicella	15
Lu	8	male	varicella	10
Lu	9	male	varicella	6
Lu	10	male	varicella	9
Lu	11	male	varicella	32
Lu	12	male	varicella	20
Lu	13	male	varicella	1
Lu	14	male	varicella	4
Lu	15	male	varicella	0
Lu	16	male	varicella	0
Lu	17	male	varicella	0
Lu	18	male	varicella	0
Lu	19	male	varicella	0
Shifang	1	male	varicella	3
Shifang	2	male	varicella	3
Shifang	3	male	varicella	3
Shifang	4	male	varicella	6
Shifang	5	male	varicella	4
Shifang	6	male	varicella	9
Shifang	7	male	varicella	9
Shifang	8	male	varicella	11
Shifang	9	male	varicella	13
Shifang	10	male	varicella	6
Shifang	11	male	varicella	6
Shifang	12	male	varicella	3
Shifang	13	male	varicella	3
Shifang	14	male	varicella	11
Shifang	15	male	varicella	1
Shifang	16	male	varicella	1
Shifang	17	male	varicella	0
Shifang	18	male	varicella	0
Shifang	19	male	varicella	0
Yuexi	1	male	varicella	0
Yuexi	2	male	varicella	2
Yuexi	3	male	varicella	0
Yuexi	4	male	varicella	1
Yuexi	5	male	varicella	1
Yuexi	6	male	varicella	0
Yuexi	7	male	varicella	0
Yuexi	8	male	varicella	2
Yuexi	9	male	varicella	1
Yuexi	10	male	varicella	0
Yuexi	11	male	varicella	2
Yuexi	12	male	varicella	1
Yuexi	13	male	varicella	2
Yuexi	14	male	varicella	2
Yuexi	15	male	varicella	0
Yuexi	16	male	varicella	0
Yuexi	17	male	varicella	0
Yuexi	18	male	varicella	0
Yuexi	19	male	varicella	0
Lu	1	female	varicella	2
Lu	2	female	varicella	9
Lu	3	female	varicella	4
Lu	4	female	varicella	5
Lu	5	female	varicella	4
Lu	6	female	varicella	4
Lu	7	female	varicella	5
Lu	8	female	varicella	7
Lu	9	female	varicella	4
Lu	10	female	varicella	5
Lu	11	female	varicella	38
Lu	12	female	varicella	12
Lu	13	female	varicella	2
Lu	14	female	varicella	7
Lu	15	female	varicella	0
Lu	16	female	varicella	0
Lu	17	female	varicella	0
Lu	18	female	varicella	0
Lu	19	female	varicella	0
Shifang	1	female	varicella	5
Shifang	2	female	varicella	0
Shifang	3	female	varicella	0
Shifang	4	female	varicella	11
Shifang	5	female	varicella	4
Shifang	6	female	varicella	8
Shifang	7	female	varicella	9
Shifang	8	female	varicella	8
Shifang	9	female	varicella	14
Shifang	10	female	varicella	1
Shifang	11	female	varicella	5
Shifang	12	female	varicella	4
Shifang	13	female	varicella	5
Shifang	14	female	varicella	12
Shifang	15	female	varicella	0
Shifang	16	female	varicella	0
Shifang	17	female	varicella	0
Shifang	18	female	varicella	0
Shifang	19	female	varicella	0
Yuexi	1	female	varicella	0
Yuexi	2	female	varicella	1
Yuexi	3	female	varicella	0
Yuexi	4	female	varicella	0
Yuexi	5	female	varicella	1
Yuexi	6	female	varicella	0
Yuexi	7	female	varicella	2
Yuexi	8	female	varicella	1
Yuexi	9	female	varicella	2
Yuexi	10	female	varicella	0
Yuexi	11	female	varicella	2
Yuexi	12	female	varicella	2
Yuexi	13	female	varicella	1
Yuexi	14	female	varicella	0
Yuexi	15	female	varicella	0
Yuexi	16	female	varicella	0
Yuexi	17	female	varicella	0
Yuexi	18	female	varicella	0
Yuexi	19	female	varicella	0

## Sheet: 2015 IIDs
DQ	age	gender	disease	number
Lu	1	male	bacillary dysentery	0
Lu	2	male	bacillary dysentery	0
Lu	3	male	bacillary dysentery	0
Lu	4	male	bacillary dysentery	0
Lu	5	male	bacillary dysentery	0
Lu	6	male	bacillary dysentery	0
Lu	7	male	bacillary dysentery	0
Lu	8	male	bacillary dysentery	0
Lu	9	male	bacillary dysentery	0
Lu	10	male	bacillary dysentery	0
Lu	11	male	bacillary dysentery	0
Lu	12	male	bacillary dysentery	0
Lu	13	male	bacillary dysentery	0
Lu	14	male	bacillary dysentery	0
Lu	15	male	bacillary dysentery	0
Lu	16	male	bacillary dysentery	0
Lu	17	male	bacillary dysentery	0
Lu	18	male	bacillary dysentery	0
Lu	19	male	bacillary dysentery	0
Shifang	1	male	bacillary dysentery	0
Shifang	2	male	bacillary dysentery	0
Shifang	3	male	bacillary dysentery	0
Shifang	4	male	bacillary dysentery	0
Shifang	5	male	bacillary dysentery	0
Shifang	6	male	bacillary dysentery	0
Shifang	7	male	bacillary dysentery	0
Shifang	8	male	bacillary dysentery	0
Shifang	9	male	bacillary dysentery	0
Shifang	10	male	bacillary dysentery	0
Shifang	11	male	bacillary dysentery	0
Shifang	12	male	bacillary dysentery	0
Shifang	13	male	bacillary dysentery	0
Shifang	14	male	bacillary dysentery	0
Shifang	15	male	bacillary dysentery	0
Shifang	16	male	bacillary dysentery	0
Shifang	17	male	bacillary dysentery	0
Shifang	18	male	bacillary dysentery	0
Shifang	19	male	bacillary dysentery	0
Yuexi	1	male	bacillary dysentery	1
Yuexi	2	male	bacillary dysentery	6
Yuexi	3	male	bacillary dysentery	6
Yuexi	4	male	bacillary dysentery	1
Yuexi	5	male	bacillary dysentery	2
Yuexi	6	male	bacillary dysentery	1
Yuexi	7	male	bacillary dysentery	1
Yuexi	8	male	bacillary dysentery	1
Yuexi	9	male	bacillary dysentery	1
Yuexi	10	male	bacillary dysentery	0
Yuexi	11	male	bacillary dysentery	1
Yuexi	12	male	bacillary dysentery	2
Yuexi	13	male	bacillary dysentery	2
Yuexi	14	male	bacillary dysentery	5
Yuexi	15	male	bacillary dysentery	9
Yuexi	16	male	bacillary dysentery	9
Yuexi	17	male	bacillary dysentery	2
Yuexi	18	male	bacillary dysentery	5
Yuexi	19	male	bacillary dysentery	4
Lu	1	female	bacillary dysentery	0
Lu	2	female	bacillary dysentery	0
Lu	3	female	bacillary dysentery	0
Lu	4	female	bacillary dysentery	0
Lu	5	female	bacillary dysentery	0
Lu	6	female	bacillary dysentery	0
Lu	7	female	bacillary dysentery	0
Lu	8	female	bacillary dysentery	0
Lu	9	female	bacillary dysentery	0
Lu	10	female	bacillary dysentery	0
Lu	11	female	bacillary dysentery	0
Lu	12	female	bacillary dysentery	0
Lu	13	female	bacillary dysentery	0
Lu	14	female	bacillary dysentery	0
Lu	15	female	bacillary dysentery	0
Lu	16	female	bacillary dysentery	0
Lu	17	female	bacillary dysentery	1
Lu	18	female	bacillary dysentery	0
Lu	19	female	bacillary dysentery	0
Shifang	1	female	bacillary dysentery	0
Shifang	2	female	bacillary dysentery	0
Shifang	3	female	bacillary dysentery	0
Shifang	4	female	bacillary dysentery	0
Shifang	5	female	bacillary dysentery	0
Shifang	6	female	bacillary dysentery	0
Shifang	7	female	bacillary dysentery	0
Shifang	8	female	bacillary dysentery	0
Shifang	9	female	bacillary dysentery	0
Shifang	10	female	bacillary dysentery	0
Shifang	11	female	bacillary dysentery	0
Shifang	12	female	bacillary dysentery	0
Shifang	13	female	bacillary dysentery	0
Shifang	14	female	bacillary dysentery	0
Shifang	15	female	bacillary dysentery	0
Shifang	16	female	bacillary dysentery	0
Shifang	17	female	bacillary dysentery	1
Shifang	18	female	bacillary dysentery	0
Shifang	19	female	bacillary dysentery	0
Yuexi	1	female	bacillary dysentery	1
Yuexi	2	female	bacillary dysentery	2
Yuexi	3	female	bacillary dysentery	6
Yuexi	4	female	bacillary dysentery	3
Yuexi	5	female	bacillary dysentery	4
Yuexi	6	female	bacillary dysentery	1
Yuexi	7	female	bacillary dysentery	0
Yuexi	8	female	bacillary dysentery	0
Yuexi	9	female	bacillary dysentery	0
Yuexi	10	female	bacillary dysentery	0
Yuexi	11	female	bacillary dysentery	1
Yuexi	12	female	bacillary dysentery	2
Yuexi	13	female	bacillary dysentery	4
Yuexi	14	female	bacillary dysentery	7
Yuexi	15	female	bacillary dysentery	5
Yuexi	16	female	bacillary dysentery	7
Yuexi	17	female	bacillary dysentery	7
Yuexi	18	female	bacillary dysentery	10
Yuexi	19	female	bacillary dysentery	4
Lu	1	male	other infectious diarrhea	68
Lu	2	male	other infectious diarrhea	44
Lu	3	male	other infectious diarrhea	10
Lu	4	male	other infectious diarrhea	3
Lu	5	male	other infectious diarrhea	4
Lu	6	male	other infectious diarrhea	1
Lu	7	male	other infectious diarrhea	0
Lu	8	male	other infectious diarrhea	1
Lu	9	male	other infectious diarrhea	0
Lu	10	male	other infectious diarrhea	1
Lu	11	male	other infectious diarrhea	1
Lu	12	male	other infectious diarrhea	2
Lu	13	male	other infectious diarrhea	2
Lu	14	male	other infectious diarrhea	2
Lu	15	male	other infectious diarrhea	2
Lu	16	male	other infectious diarrhea	2
Lu	17	male	other infectious diarrhea	6
Lu	18	male	other infectious diarrhea	4
Lu	19	male	other infectious diarrhea	6
Shifang	1	male	other infectious diarrhea	20
Shifang	2	male	other infectious diarrhea	20
Shifang	3	male	other infectious diarrhea	4
Shifang	4	male	other infectious diarrhea	0
Shifang	5	male	other infectious diarrhea	0
Shifang	6	male	other infectious diarrhea	1
Shifang	7	male	other infectious diarrhea	0
Shifang	8	male	other infectious diarrhea	0
Shifang	9	male	other infectious diarrhea	0
Shifang	10	male	other infectious diarrhea	0
Shifang	11	male	other infectious diarrhea	2
Shifang	12	male	other infectious diarrhea	0
Shifang	13	male	other infectious diarrhea	0
Shifang	14	male	other infectious diarrhea	3
Shifang	15	male	other infectious diarrhea	0
Shifang	16	male	other infectious diarrhea	0
Shifang	17	male	other infectious diarrhea	1
Shifang	18	male	other infectious diarrhea	4
Shifang	19	male	other infectious diarrhea	1
Yuexi	1	male	other infectious diarrhea	4
Yuexi	2	male	other infectious diarrhea	2
Yuexi	3	male	other infectious diarrhea	0
Yuexi	4	male	other infectious diarrhea	3
Yuexi	5	male	other infectious diarrhea	1
Yuexi	6	male	other infectious diarrhea	0
Yuexi	7	male	other infectious diarrhea	0
Yuexi	8	male	other infectious diarrhea	0
Yuexi	9	male	other infectious diarrhea	0
Yuexi	10	male	other infectious diarrhea	0
Yuexi	11	male	other infectious diarrhea	0
Yuexi	12	male	other infectious diarrhea	0
Yuexi	13	male	other infectious diarrhea	1
Yuexi	14	male	other infectious diarrhea	1
Yuexi	15	male	other infectious diarrhea	2
Yuexi	16	male	other infectious diarrhea	1
Yuexi	17	male	other infectious diarrhea	1
Yuexi	18	male	other infectious diarrhea	2
Yuexi	19	male	other infectious diarrhea	0
Lu	1	female	other infectious diarrhea	58
Lu	2	female	other infectious diarrhea	24
Lu	3	female	other infectious diarrhea	5
Lu	4	female	other infectious diarrhea	2
Lu	5	female	other infectious diarrhea	0
Lu	6	female	other infectious diarrhea	0
Lu	7	female	other infectious diarrhea	0
Lu	8	female	other infectious diarrhea	0
Lu	9	female	other infectious diarrhea	0
Lu	10	female	other infectious diarrhea	1
Lu	11	female	other infectious diarrhea	1
Lu	12	female	other infectious diarrhea	2
Lu	13	female	other infectious diarrhea	2
Lu	14	female	other infectious diarrhea	5
Lu	15	female	other infectious diarrhea	3
Lu	16	female	other infectious diarrhea	7
Lu	17	female	other infectious diarrhea	3
Lu	18	female	other infectious diarrhea	2
Lu	19	female	other infectious diarrhea	2
Shifang	1	female	other infectious diarrhea	14
Shifang	2	female	other infectious diarrhea	15
Shifang	3	female	other infectious diarrhea	3
Shifang	4	female	other infectious diarrhea	2
Shifang	5	female	other infectious diarrhea	0
Shifang	6	female	other infectious diarrhea	0
Shifang	7	female	other infectious diarrhea	1
Shifang	8	female	other infectious diarrhea	0
Shifang	9	female	other infectious diarrhea	0
Shifang	10	female	other infectious diarrhea	0
Shifang	11	female	other infectious diarrhea	0
Shifang	12	female	other infectious diarrhea	0
Shifang	13	female	other infectious diarrhea	0
Shifang	14	female	other infectious diarrhea	1
Shifang	15	female	other infectious diarrhea	1
Shifang	16	female	other infectious diarrhea	3
Shifang	17	female	other infectious diarrhea	1
Shifang	18	female	other infectious diarrhea	0
Shifang	19	female	other infectious diarrhea	1
Yuexi	1	female	other infectious diarrhea	6
Yuexi	2	female	other infectious diarrhea	0
Yuexi	3	female	other infectious diarrhea	1
Yuexi	4	female	other infectious diarrhea	1
Yuexi	5	female	other infectious diarrhea	0
Yuexi	6	female	other infectious diarrhea	1
Yuexi	7	female	other infectious diarrhea	0
Yuexi	8	female	other infectious diarrhea	0
Yuexi	9	female	other infectious diarrhea	0
Yuexi	10	female	other infectious diarrhea	0
Yuexi	11	female	other infectious diarrhea	2
Yuexi	12	female	other infectious diarrhea	1
Yuexi	13	female	other infectious diarrhea	0
Yuexi	14	female	other infectious diarrhea	0
Yuexi	15	female	other infectious diarrhea	2
Yuexi	16	female	other infectious diarrhea	0
Yuexi	17	female	other infectious diarrhea	0
Yuexi	18	female	other infectious diarrhea	1
Yuexi	19	female	other infectious diarrhea	0
Lu	1	male	HFMD	19
Lu	2	male	HFMD	53
Lu	3	male	HFMD	32
Lu	4	male	HFMD	18
Lu	5	male	HFMD	8
Lu	6	male	HFMD	2
Lu	7	male	HFMD	1
Lu	8	male	HFMD	0
Lu	9	male	HFMD	0
Lu	10	male	HFMD	0
Lu	11	male	HFMD	0
Lu	12	male	HFMD	0
Lu	13	male	HFMD	0
Lu	14	male	HFMD	1
Lu	15	male	HFMD	0
Lu	16	male	HFMD	0
Lu	17	male	HFMD	0
Lu	18	male	HFMD	0
Lu	19	male	HFMD	0
Shifang	1	male	HFMD	13
Shifang	2	male	HFMD	169
Shifang	3	male	HFMD	139
Shifang	4	male	HFMD	93
Shifang	5	male	HFMD	25
Shifang	6	male	HFMD	6
Shifang	7	male	HFMD	3
Shifang	8	male	HFMD	2
Shifang	9	male	HFMD	0
Shifang	10	male	HFMD	0
Shifang	11	male	HFMD	2
Shifang	12	male	HFMD	0
Shifang	13	male	HFMD	0
Shifang	14	male	HFMD	0
Shifang	15	male	HFMD	0
Shifang	16	male	HFMD	0
Shifang	17	male	HFMD	0
Shifang	18	male	HFMD	0
Shifang	19	male	HFMD	0
Yuexi	1	male	HFMD	1
Yuexi	2	male	HFMD	7
Yuexi	3	male	HFMD	6
Yuexi	4	male	HFMD	3
Yuexi	5	male	HFMD	0
Yuexi	6	male	HFMD	0
Yuexi	7	male	HFMD	0
Yuexi	8	male	HFMD	1
Yuexi	9	male	HFMD	0
Yuexi	10	male	HFMD	0
Yuexi	11	male	HFMD	0
Yuexi	12	male	HFMD	0
Yuexi	13	male	HFMD	0
Yuexi	14	male	HFMD	0
Yuexi	15	male	HFMD	0
Yuexi	16	male	HFMD	0
Yuexi	17	male	HFMD	0
Yuexi	18	male	HFMD	0
Yuexi	19	male	HFMD	0
Lu	1	female	HFMD	7
Lu	2	female	HFMD	42
Lu	3	female	HFMD	29
Lu	4	female	HFMD	3
Lu	5	female	HFMD	5
Lu	6	female	HFMD	3
Lu	7	female	HFMD	1
Lu	8	female	HFMD	3
Lu	9	female	HFMD	0
Lu	10	female	HFMD	1
Lu	11	female	HFMD	0
Lu	12	female	HFMD	0
Lu	13	female	HFMD	1
Lu	14	female	HFMD	0
Lu	15	female	HFMD	0
Lu	16	female	HFMD	0
Lu	17	female	HFMD	0
Lu	18	female	HFMD	0
Lu	19	female	HFMD	0
Shifang	1	female	HFMD	21
Shifang	2	female	HFMD	102
Shifang	3	female	HFMD	104
Shifang	4	female	HFMD	57
Shifang	5	female	HFMD	17
Shifang	6	female	HFMD	4
Shifang	7	female	HFMD	0
Shifang	8	female	HFMD	1
Shifang	9	female	HFMD	0
Shifang	10	female	HFMD	0
Shifang	11	female	HFMD	1
Shifang	12	female	HFMD	0
Shifang	13	female	HFMD	0
Shifang	14	female	HFMD	0
Shifang	15	female	HFMD	0
Shifang	16	female	HFMD	0
Shifang	17	female	HFMD	0
Shifang	18	female	HFMD	0
Shifang	19	female	HFMD	0
Yuexi	1	female	HFMD	2
Yuexi	2	female	HFMD	6
Yuexi	3	female	HFMD	5
Yuexi	4	female	HFMD	2
Yuexi	5	female	HFMD	1
Yuexi	6	female	HFMD	2
Yuexi	7	female	HFMD	0
Yuexi	8	female	HFMD	0
Yuexi	9	female	HFMD	0
Yuexi	10	female	HFMD	0
Yuexi	11	female	HFMD	0
Yuexi	12	female	HFMD	0
Yuexi	13	female	HFMD	0
Yuexi	14	female	HFMD	0
Yuexi	15	female	HFMD	0
Yuexi	16	female	HFMD	0
Yuexi	17	female	HFMD	0
Yuexi	18	female	HFMD	0
Yuexi	19	female	HFMD	0
